# Supplementary material for: Universal Semantic Embeddings of Chemical Elements for Enhanced Materials Inference and Discovery
Source: Research Square preprint supplement (doi:10.21203/rs.3.rs-6370871/v1), 2025-05-12
Supplement: Supplementary file 1 [file 087f830345ad98571dba1518.docx]

**Supplementary**

**Universal Semantic Embeddings of Chemical Elements for Enhanced Materials Inference and Discovery**

Yunze Jia1,#, Yuehui Xian1,#, Yangyang Xu2,#, Xiangdong Ding1, Jun Sun1, Yumei Zhou1,*, Dezhen Xue1,*

1 *State Key Laboratory for Mechanical Behavior of Materials, Xi'an Jiaotong University, Xi'an 710049, PR China*

*2 MOE Key Laboratory for Nonequilibrium Synthesis and Modulation of Condensed Matter, School of Physics, Xi'an Jiaotong University, Xi'an 710049, PR China*

# *Contributed equally.*

*Correspondence: Y. Zhou (zhouyumei@xjtu.edu.cn); D. Xue (xuedezhen@xjtu.edu.cn)

This PDF file includes 5 sections with **Figures S1** to **S4** and **Tables S1** to **S7**.

**Model Development, Feature Selection, and Empirical Descriptors:**


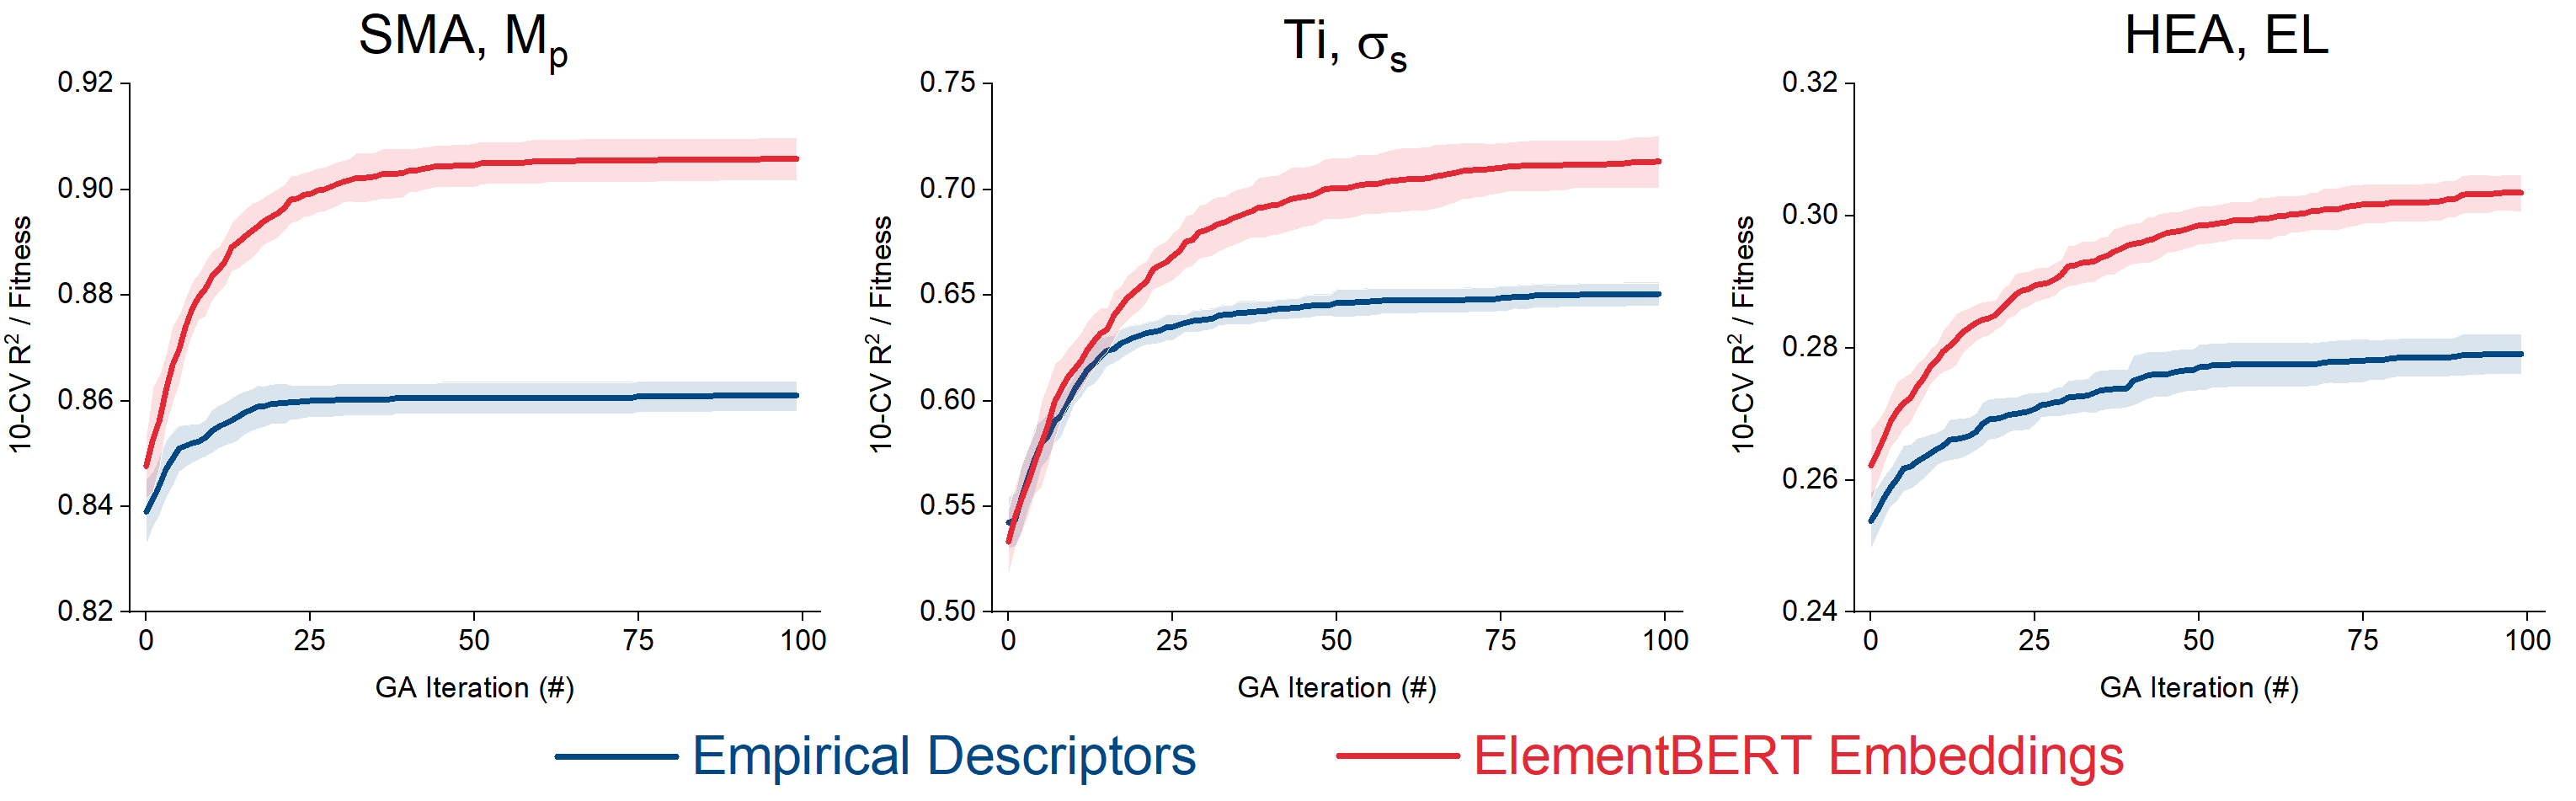


**Figure S1**. Genetic Algorithm (GA) feature subset selection process for empirical descriptors and ElementBERT embeddings.

The Genetic Algorithm (GA) was employed as a robust optimization tool for feature subset selection, enabling the identification of the most informative features from a large pool of candidates derived from either empirical descriptors or ElementBERT embeddings. The GA was configured with a population size of 192 individuals, matching the number of CPU cores available in the supercomputing node, and was evolved over 100 generations. The crossover probability was set to 0.8, and the mutation probability to 0.1. The optimization objective was to maximize the average R2 across four independent rounds of 10-fold cross-validation. A total of 30 distinct features were computed from empirical descriptors using the mole average functional form, while 384 features were derived from ElementBERT embeddings using the same mole average strategy. Despite the difference in feature count, both approaches were allocated the same optimization budget (192 individuals over 100 generations) to ensure a fair and unbiased comparison. To assess the reliability and robustness of the GA process, multiple independent evaluations were conducted. Specifically, 100 experimental data points were randomly selected from each dataset using a random seed, and GA-based feature subset selection was performed separately for empirical descriptors and ElementBERT embeddings. This process was repeated across 24 independent sets of 100 random points, revealing a consistent optimization trajectory across all trials. As shown in Figure S1, the GA process exhibited a rapid initial increase in fitness, followed by convergence to a stable solution in later generations. This pattern indicates effective adaptation and convergence of the population, confirming the robustness and reliability of the GA optimization procedure.


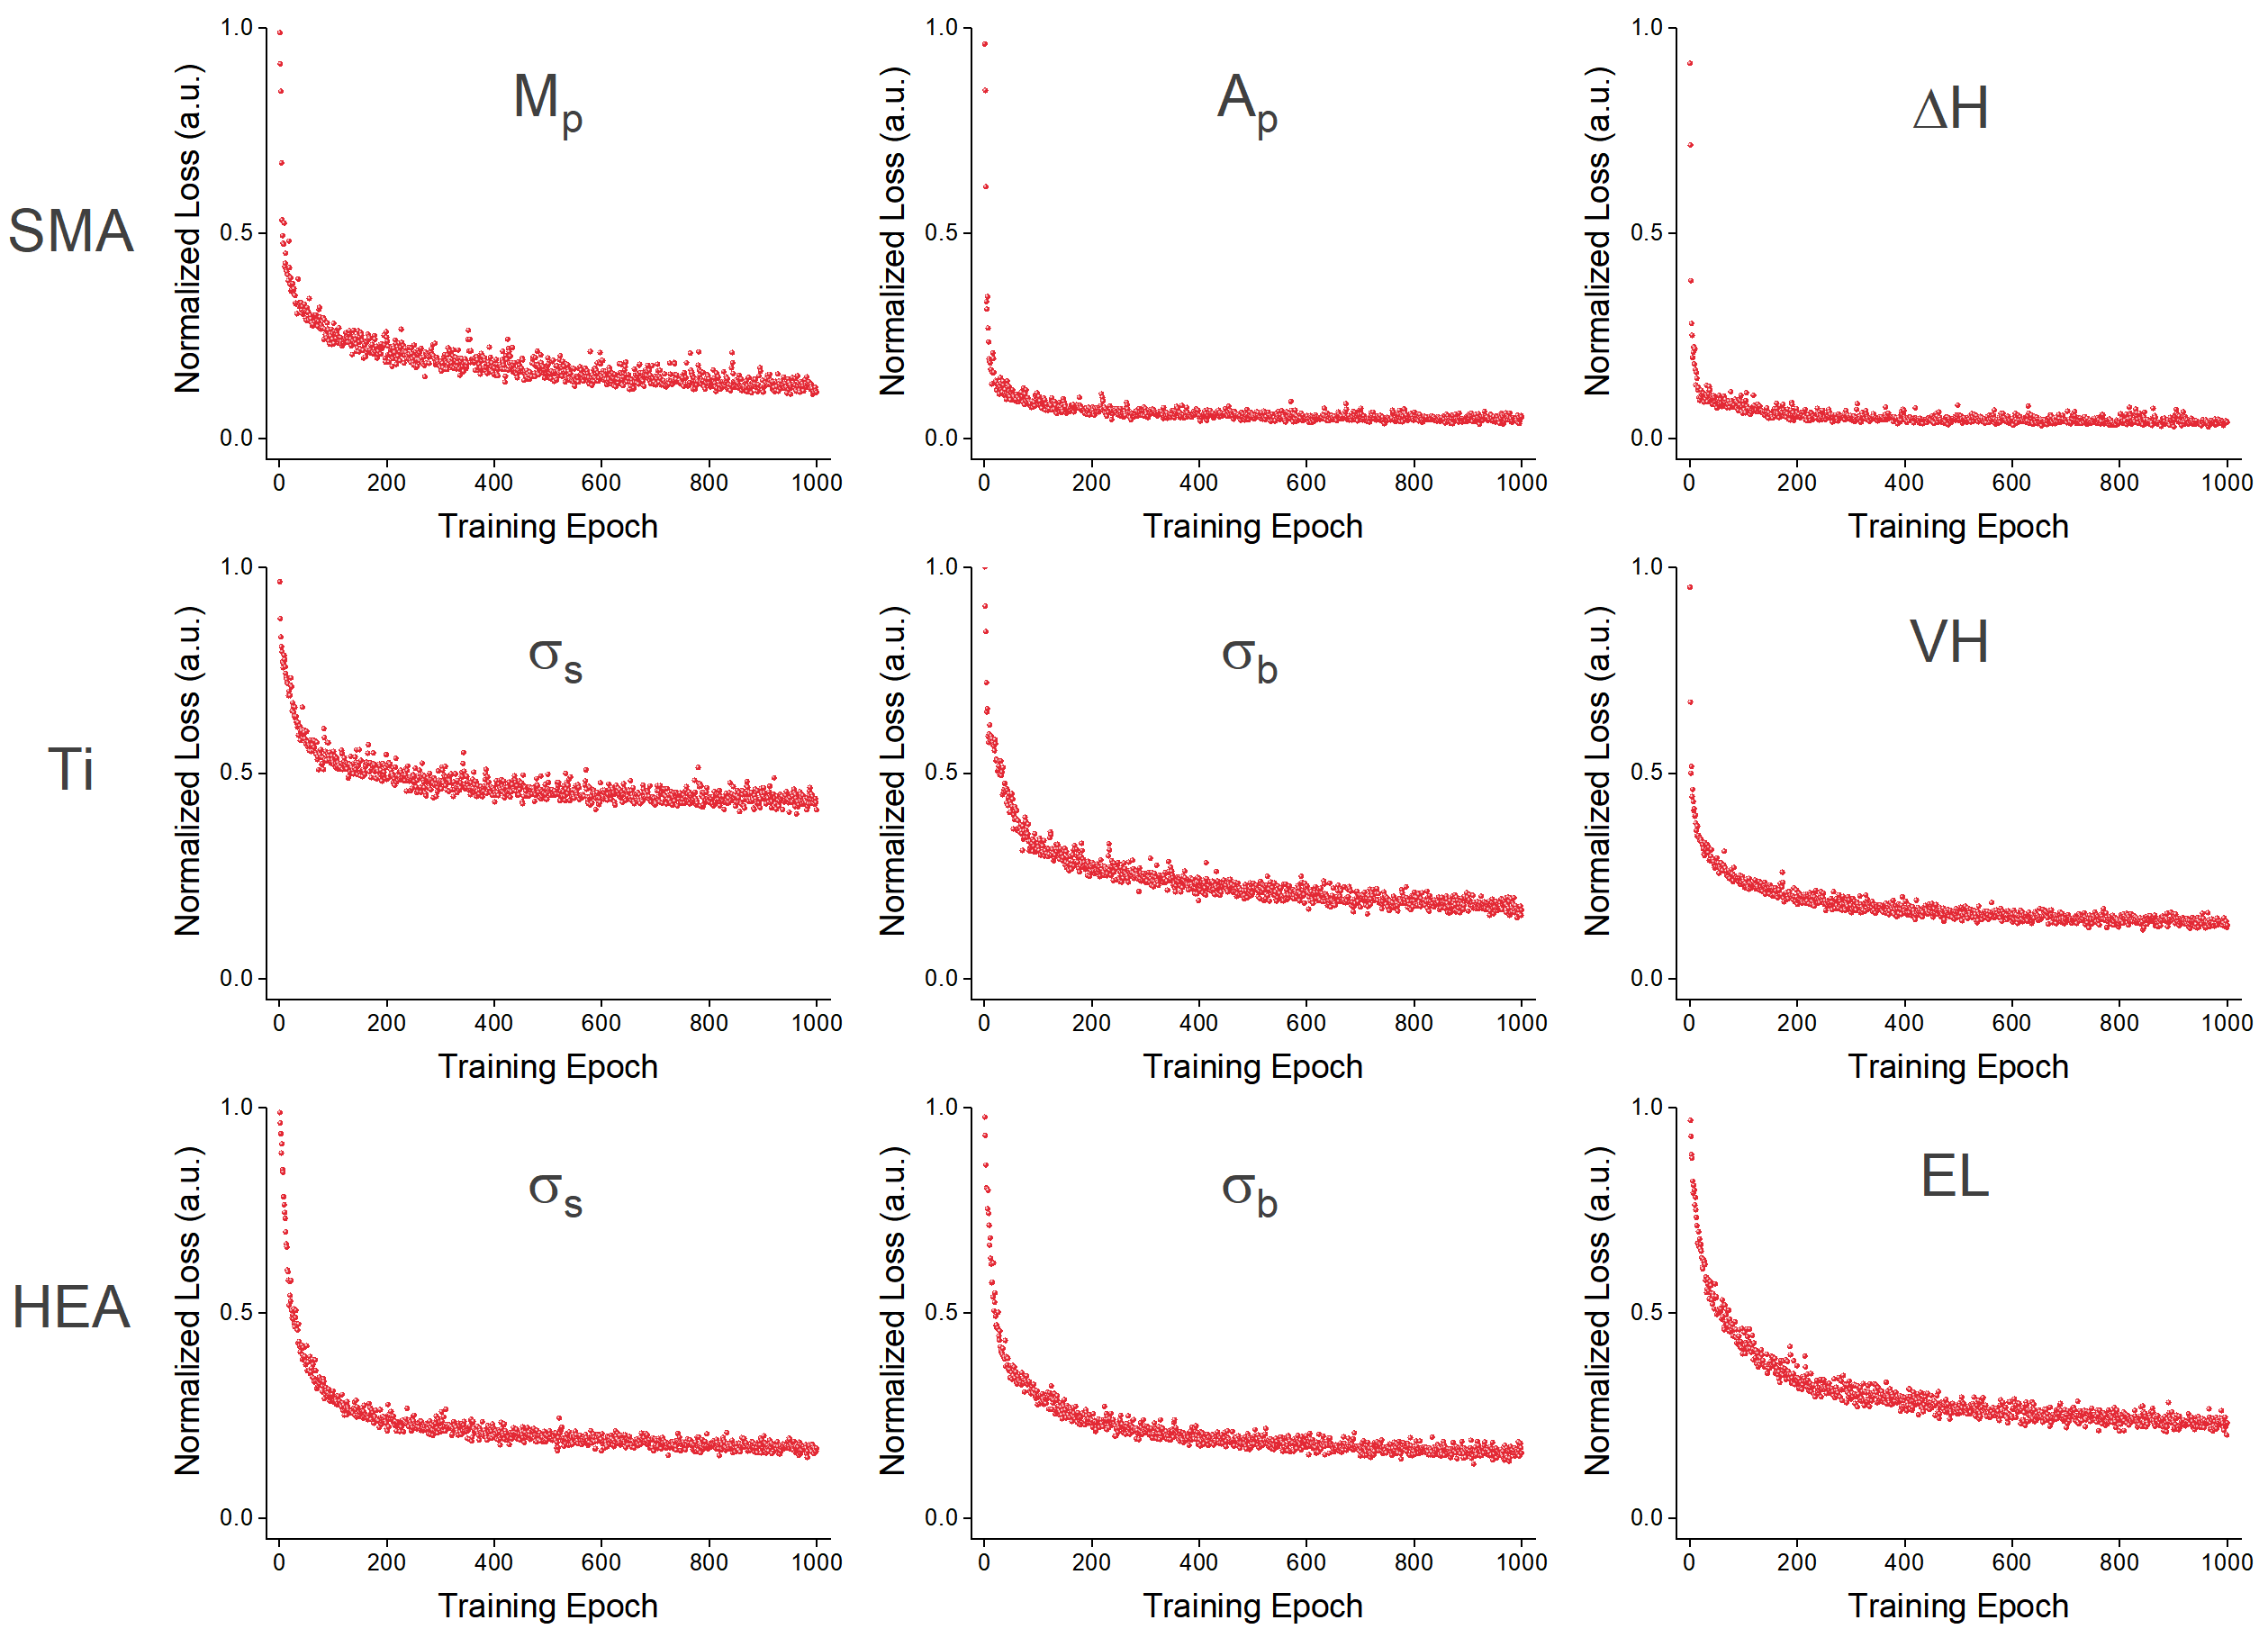


**Figure S2**. Normalized training losses over 1,000 epochs for a total of nine neural networks across three alloy systems. The results illustrate a gradual stabilization of loss after approximately 300 training epochs, indicating effective learning and convergence.

To construct reliable neural network models as pseudo ground truth for evaluating alloy optimization algorithms, we developed convolutional neural networks (CNNs) for three alloy systems, each predicting three different properties. Each CNN processes elemental features through two convolutional layers (kernel dimensions: 3 × Nₑₗₑₘ × Nₑₐₜᵤᵣₑ), followed by batch normalization and residual connections, which incorporate processing conditions directly into the feature space. The resulting tensor is then flattened and reduced through two fully connected layers (with 128 and 1 node, respectively). The network uses Exponential Linear Unit (ELU) activations and dropout regularization to mitigate overfitting. Each model was trained over 1000 epochs using the Adam optimizer (learning rate: 5 × 10⁻⁴, batch size: 16). These models predict a composite figure of merit (FOM), which combines multiple target properties into a single optimization objective for each alloy system. This approach simulates a realistic and challenging design landscape, enabling a systematic comparison between empirical descriptors and ElementBERT embeddings within the Bayesian optimization (BO) framework while reflecting practical materials development constraints.

The training loss curves, shown in Figure S2, illustrate the normalized loss progression for each property across the three alloy systems: shape memory alloys (SMA), Ti alloys, and high-entropy alloys (HEA). The consistent decline in normalized loss over training epochs demonstrates effective learning and convergence across all models. Notably, the loss stabilizes after approximately 300 epochs, indicating that the networks have successfully captured the underlying relationships between composition, processing conditions, and target properties. This robust training process supports the reliability of these neural networks as surrogate ground truth models, providing a solid foundation for evaluating Bayesian optimization performance using both empirical descriptors and ElementBERT embeddings.

The full list of empirical descriptors considered in this study is provided in Table S1. The numerical values corresponding to these empirical descriptors can be accessed through our GitHub repository [https://github.com/diegoxue/ElementBERT].

**Table S1** Empirical descriptors and their abbreviations.

| **Abbreviation** | **Description** |
| --- | --- |
| AN | Atomic Number |
| QN | Quantum Number |
| C | Column in the Periodic Table |
| RAM | Relative Atomic Mass |
| VA | Atom Volume |
| R | Atom Radius |
| AEN | Atomic Environment Number |
| VEC | Valence Electron Concentration |
| XMB | Electronegativity (Martynov & Batsanov) |
| XP | Electronegativity Mismatch (Pauling) |
| XA | Electronegativity Mismatch (Allen) |
| G | Shear Modulus |
| E | Elastic Modulus |
| FIE | First Ionization Energy |
| SIE | Second Ionization Energy |
| TIE | Third Ionization Energy |
| CPM | Chemical Potential (Miedema) |
| WF | Work Function |
| NCE | Effective Nuclear Charge (Slater) |
| CNE | Effective Charge Nuclear (Clementi) |
| MT | Melting Point |
| TB | Boiling Temperature |
| EV | Vaporization Enthalpy |
| EM | Melting Enthalpy |
| EA | Atomization Enthalpy |
| CE | Cohesive Energy |
| MC | Compression Modulus |
| DVE | Valence Electron Distance (Schubert) |
| DCE | Core Electron Distance (Schubert) |
| D | Density |

**Architecture and hyperparameters of ElementBERT:**

**Table S2** ElementBERT model hyperparameters DebertaV2ForMaskedLM [1]

| **Hyperparameters** | **Details** |
| --- | --- |
| **Attention Probabilities Dropout Rate** (attention_probs_dropout_prob) | 0.1 |
| **Activation Function** (hidden_act) | Gaussian Error Liner Unit(GELU) |
| **Hidden Layer Dropout Rate** (hidden_dropout_prob) | 0.1 |
| **Hidden Layer Size** (hidden_size) | 384 |
| **Initialization Range** (initializer_range) | 0.02 |
| **Intermediate Layer Size** (intermediate_size) | 1536 |
| **Layer Normalization Epsilon** (layer_norm_eps) | 1.00E-07 |
| **Maximum Position Embeddings** (max_position_embeddings) | 512 |
| **Maximum Relative Positions** (max_relative_positions) | -1 |
| **Relative Embedding Normalization Type** (norm_rel_ebd) | Layer Normalization |
| **Number of Attention Heads** (num_attention_heads) | 6 |
| **Number of Hidden Layers** (num_hidden_layers) | 12 |
| **Pooler Activation Function** (pooler_hidden_act) | Gaussian Error Liner Unit(GELU) |
| **Pooler Hidden Size** (pooler_hidden_size) | 384 |

This section provides a detailed summary of ElementBERT’s architecture and training hyperparameters, offering transparency and reproducibility for future research and potential extensions.

Table S2 presents a comprehensive overview of ElementBERT, which is built on the DeBERTaV2ForMaskedLM [1] model. The model features a hidden layer size of 384 and an intermediate size of 1536, with 12 transformer layers, each equipped with 6 attention heads. To mitigate overfitting, dropout rates of 0.1 are applied to both attention probabilities and hidden layers. The Gaussian Error Linear Unit (GELU) serves as the activation function for both the hidden layers and the pooler layer, ensuring smooth and stable activations.

The model’s weights are initialized with a standard deviation of 0.02, and layer normalization is applied with a small epsilon value of 1.0×10-7 to prevent division by zero. ElementBERT can process input sequences up to 512 tokens long, with no upper limit on the number of relative position embeddings. Furthermore, layer normalization is also applied to the relative embedding normalization. The pooler hidden size is set to 384, and a 0.1 dropout rate is used for the hidden layers. These configurations are designed to balance model complexity, training stability, and computational efficiency, ultimately enhancing ElementBERT’s performance and generalization during training.


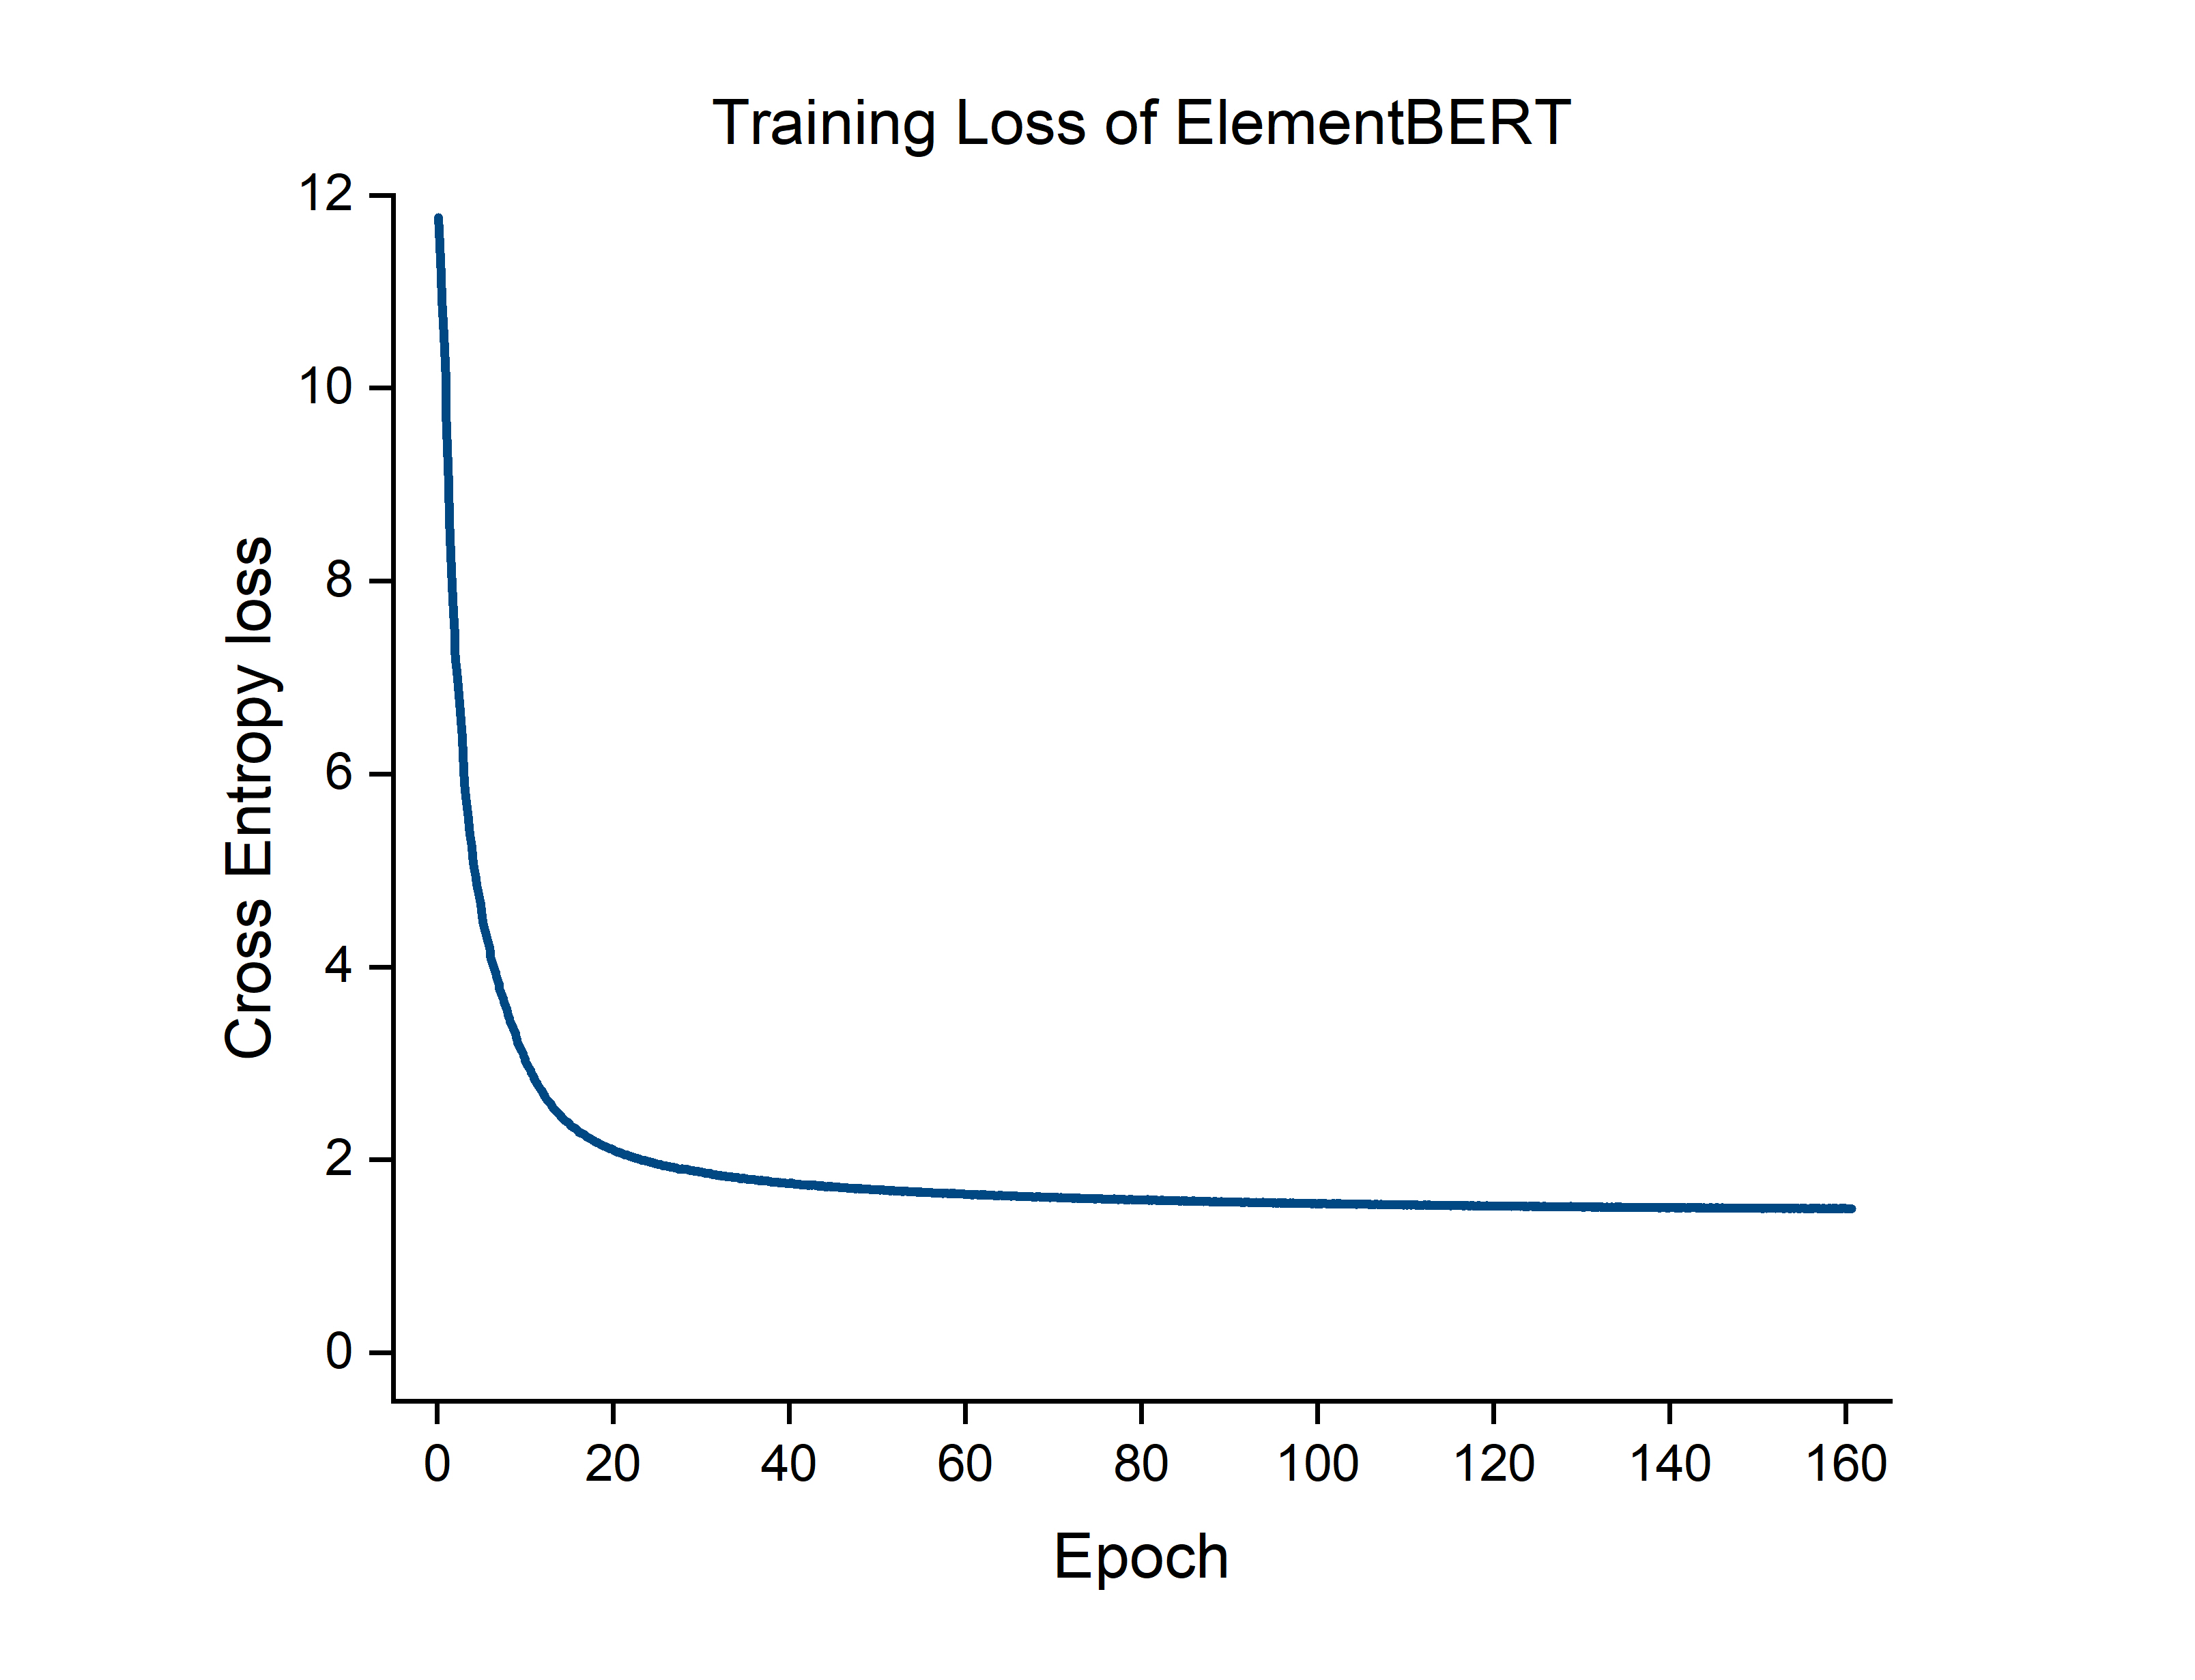


**Figure S3.** Training curve of ElementBERT, showing the progression of cross-entropy loss over training epochs. The gradual decrease in loss indicates effective convergence, with a final evaluation loss of 1.397 after 130,000 steps. The training duration could potentially be reduced by about one-third without significant performance loss.

To demonstrate the training process of ElementBERT, we present Figure S3**,** illustrating the evolution of cross-entropy training loss over the course of training. The x-axis represents the number of epochs, while the y-axis denotes the training loss at each epoch. The plot demonstrates gradual convergence, with training loss steadily decreasing as training progresses. After 130,000 training steps, the final evaluation loss reaches 1.397, reflecting the model’s performance on a held-out evaluation set distinct from the training corpus. Interestingly, the gradual decline in cross-entropy loss suggests that training could potentially be shortened by approximately one-third without significantly compromising model performance, thereby improving overall training efficiency.

The code implementation of the training of ElementBERT was inspired by Tian [2], with appropriate modifications to fit the context of this study.

**Hyperparameter Tuning for Machine Learning Models:**

To ensure fair and optimal evaluation of ElementBERT-derived features, we conducted comprehensive hyperparameter tuning for all baseline machine learning models using empirical descriptors, providing well-optimized reference models for comparison.

Tables S3–S6 summarize the hyperparameter tuning details for the four machine learning models used as base learners in downstream prediction tasks. These models were tuned using the bayesian_optimization package [3] in Python, with empirical features serving as input. The optimized hyperparameters provide baseline configurations for comparison with models using ElementBERT-derived features, which ultimately demonstrated superior predictive performance.

Table S3 outlines the hyperparameter tuning process for the Multilayer Perceptron (MLP) model. Key hyperparameters include the sizes of five hidden layers, each chosen from the discrete set: [1024, 512, 256, 128, 64]. Additional hyperparameters, such as learning rate (0.001 to 0.01), regularization parameter (1×10-5 to 0.001), and batch size, were tuned to optimize performance. Training was capped at 3000 iterations, with 20% of the data used for validation. An adaptive learning rate strategy and early stopping (50 consecutive non-improving iterations) were applied to enhance training efficiency.

Table S4 details the hyperparameter tuning for the Random Forest model. Key parameters include the number of estimators (ranging from 50 to 300) and maximum tree depth (3 to 20). The minimum samples required to split a node (2 to 10) and the minimum samples at leaf nodes (1 to 5) were also optimized. The maximum number of features considered per split was tuned between 0.3 and 1.0, and the training sample fraction was varied between 0.5 and 1.0. These hyperparameters were treated as continuous variables, enabling the optimization algorithm to explore finely-grained values.

Table S5 lists the optimized hyperparameters for the Support Vector Machine (SVM) model using an RBF kernel. The regularization parameter (C) was tuned between 0.1 and 1000, while epsilon, which defines the margin of tolerance, ranged from 0.001 to 1.0. The RBF kernel parameter (gamma) was optimized between 0.001 and 10.0, with all parameters explored as continuous values.

Table S6 summarizes the hyperparameter tuning for the XGBoost model. The maximum tree depth was tuned between 8 and 25, while the learning rate ranged from 0.01 to 0.2. The number of estimators varied from 500 to 3000, and the minimum child weight was tuned between 1 and 8. Both the subsample rate and column sample rate per tree ranged from 0.7 to 1.0. The gamma parameter, controlling the minimum loss reduction required for further splitting, was tuned between 5 and 15. Finally, L1 regularization was optimized between 0 and 5, and L2 regularization between 1 and 5.

**Table S3.** Hyperparameter ranges and tuning details for the Multilayer Perceptron (MLP) model, optimized using the bayesian_optimization package with empirical features.

| **Hyperparameters** | **Tuning Details** |
| --- | --- |
| **Hidden Layer 1 Size** (layer1) | [1024, 512, 256, 128, 64] |
| **Hidden Layer 2 Size** (layer2) | [1024, 512, 256, 128, 64] |
| **Hidden Layer 3 Size** (layer3) | [1024, 512, 256, 128, 64] |
| **Hidden Layer 4 Size** (layer4) | [1024, 512, 256, 128, 64] |
| **Hidden Layer 5 Size** (layer5) | [1024, 512, 256, 128, 64] |
| **Learning Rate** (learning_rate_init) | (0.0001, 0.01) |
| **Regularization Parameter** (alpha) | (0.00001, 0.001) |
| **Batch Size** (batch_size) | (8, 32) |
| **Max Iterations** (max_iter) | 3000 |
| **Validation Fraction** (validation_fraction) | 0.2 |
| **Iterations Without Change** (n_iter_no_change) | 50 |
| **Learning Rate Strategy** (learning_rate) | Adaptive |

**Table S4.** Hyperparameter ranges and tuning details for the Random Forest model, optimized using the bayesian_optimization package with empirical features.

| **Hyperparameter** | **Tuning Details** |
| --- | --- |
| **Number of Estimators** (n_estimators) | (50, 300) |
| **Maximum Depth** (max_depth) | (3, 20) |
| **Minimum Samples Split** (min_samples_split) | (2, 10) |
| **Minimum Samples Leaf** (min_samples_leaf) | (1, 5) |
| **Maximum Features** (max_features) | (0.3, 1.0) |
| **Maximum Samples** (max_samples) | (0.5, 1.0) |

**Table S5.** Hyperparameter ranges and tuning details for the Support Vector Machine (SVM) model with RBF kernel, optimized using the bayesian_optimization package with empirical features.

| **Hyperparameter** | **Tuning Details** |
| --- | --- |
| **Regularization Parameter** (C) | (0.1, 1000.0) |
| **Epsilon Tube Parameter** (epsilon) | (0.001, 1.0) |
| **RBF Kernel Parameter** (gamma) | (0.001, 10.0) |

**Table S6.** Hyperparameter ranges and tuning details for the XGBoost model, optimized using the bayesian_optimization package with empirical features.

| **Hyperparameter** | **Tuning Details** |
| --- | --- |
| **Max Depth** (max_depth) | (8, 25) |
| **Learning Rate** (learning_rate) | (0.01, 0.2) |
| **Number of Estimators** (n_estimators) | (500, 3000) |
| **Min Child Weight** (min_child_weight) | (1, 8) |
| **Subsample** (subsample) | (0.7, 1.0) |
| **Colsample by Tree** (colsample_bytree) | (0.7, 1.0) |
| **Gamma** (gamma) | (5, 15) |
| **L1 Regularization** (reg_alpha) | (0, 5) |
| **L2 Regularization** (reg_lambda) | (1, 5) |

**Information Entropy Analysis of Semantic Embeddings and Empirical Features：**

To better understand the information encoding characteristics of semantic embeddings compared to empirical features, we conducted an information entropy analysis, quantifying the diversity and distributional properties of both feature types.


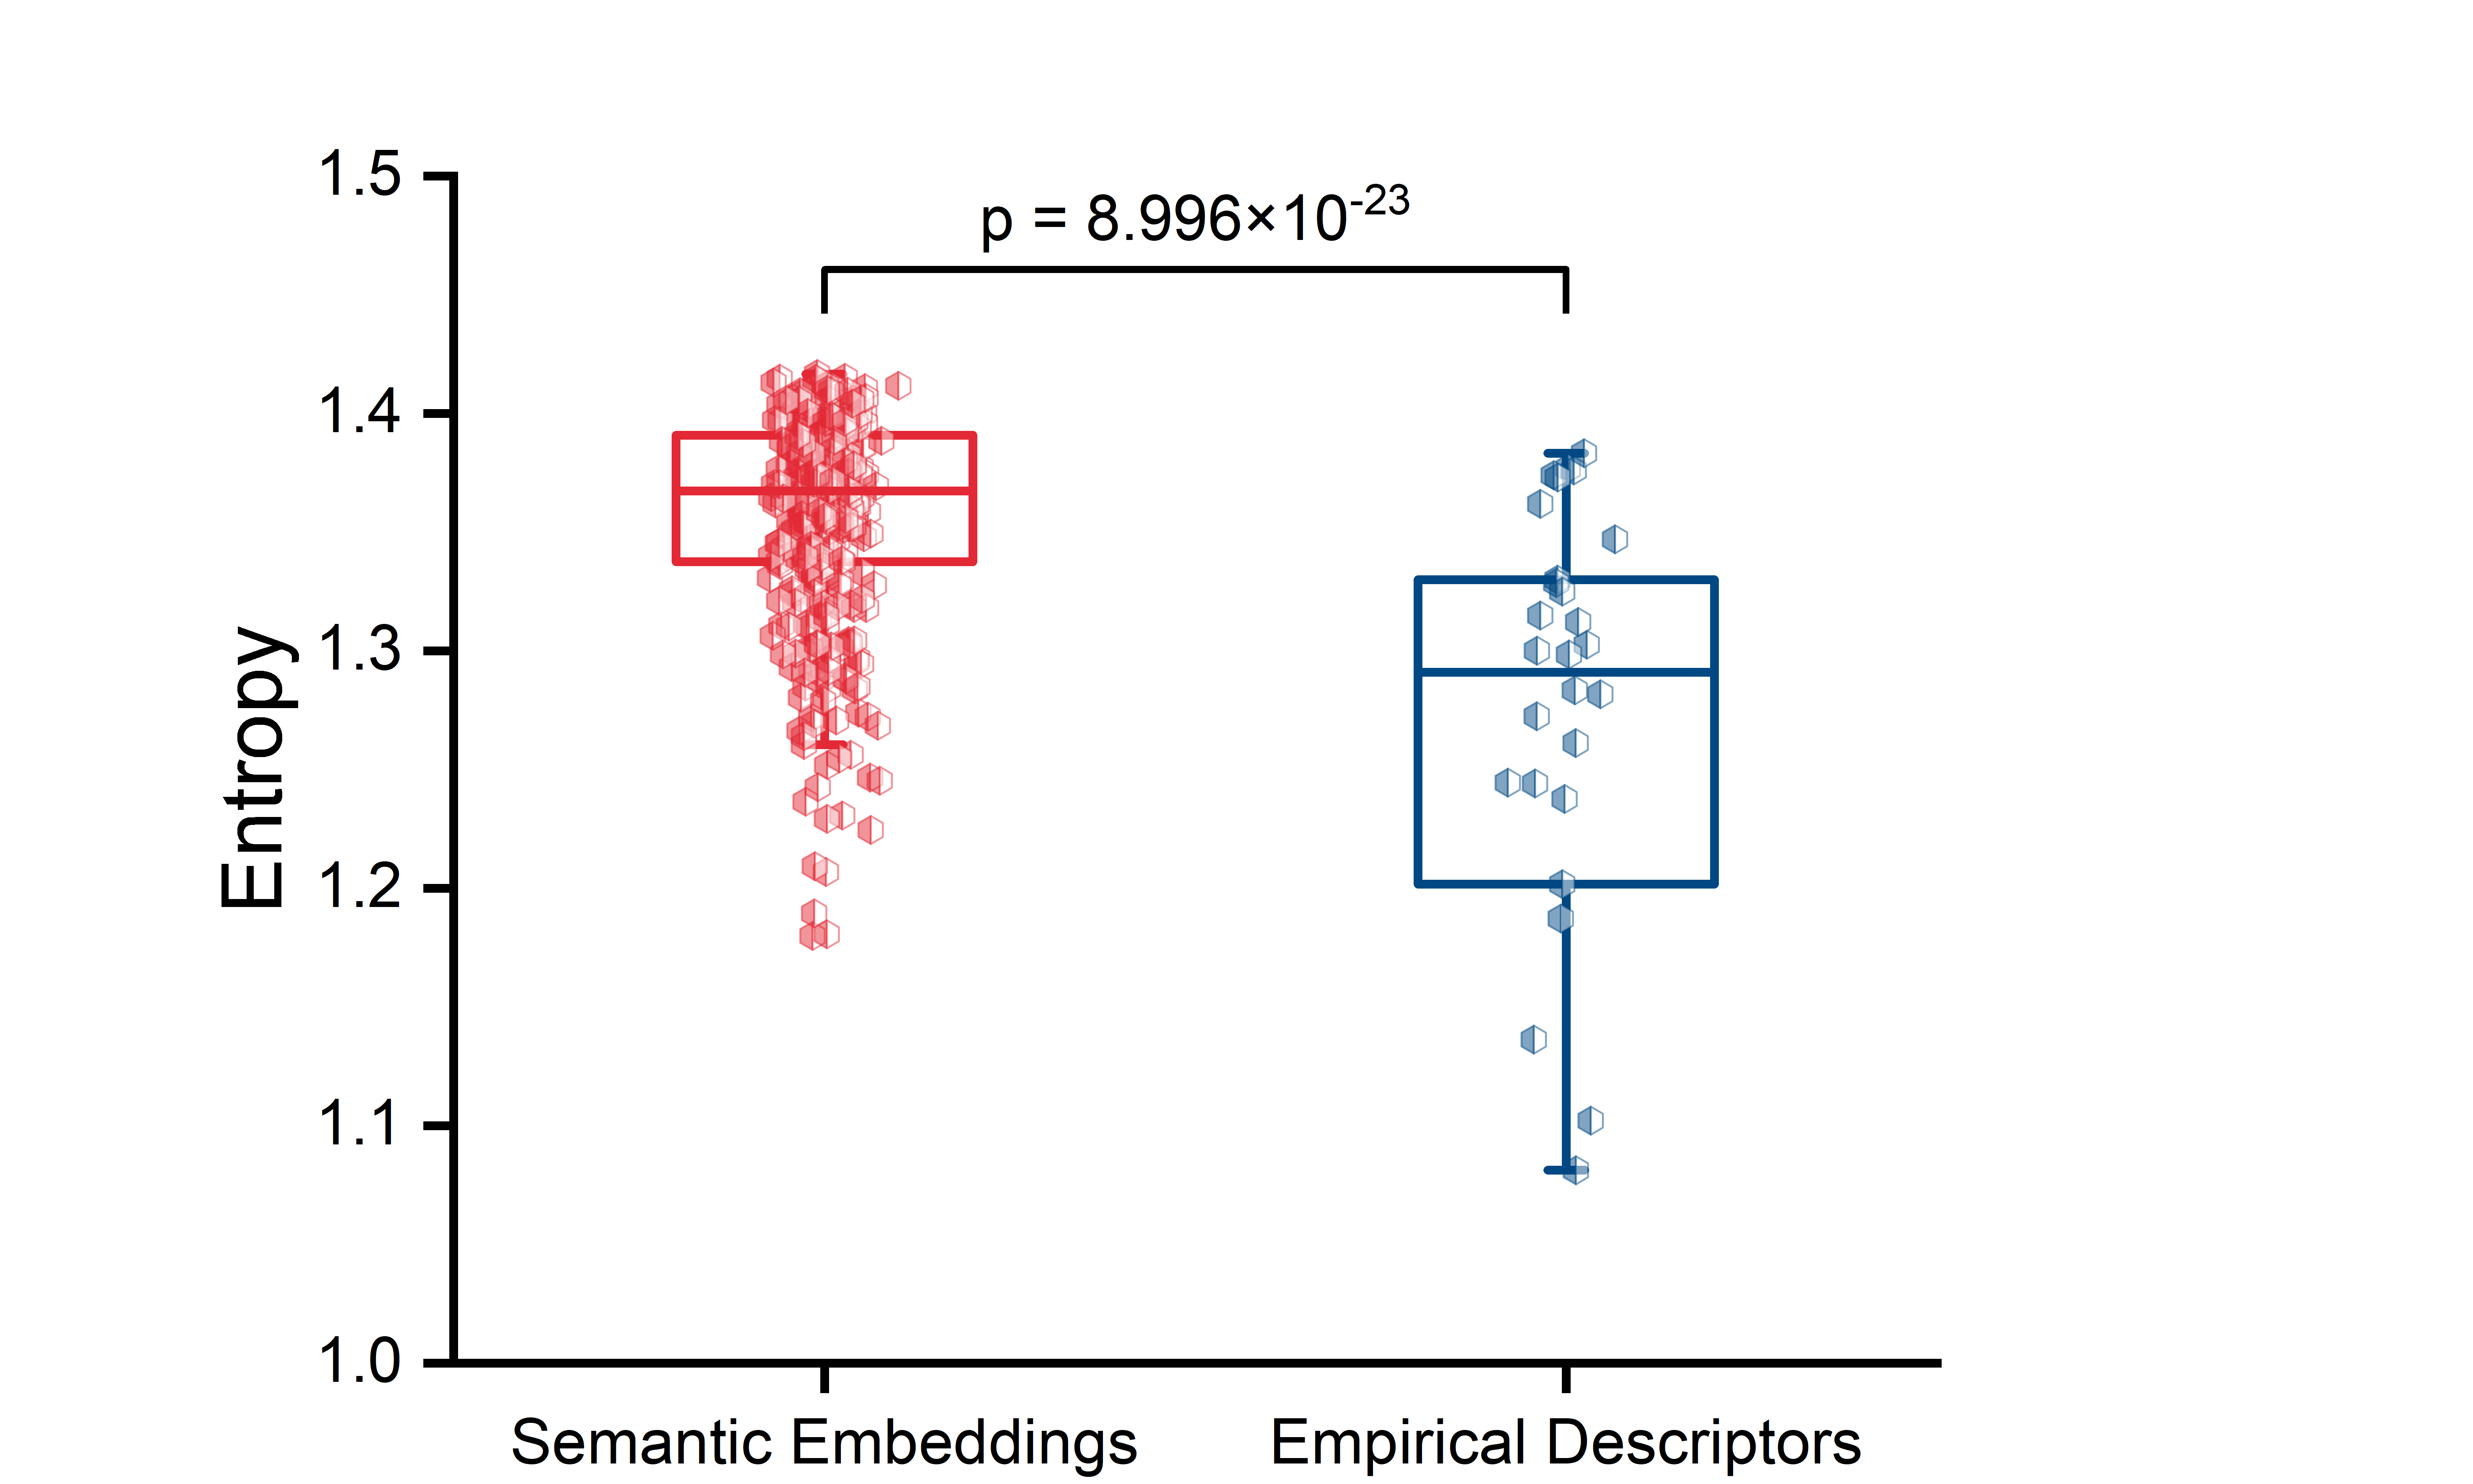


**Figure S4** The Entropy of Element Embeddings and Empirical Descriptors

**Figure S4** illustrates a clear disparity between the information entropy distributions of semantic embeddings and empirical features. Semantic embeddings consistently exhibit higher and more tightly clustered entropy values (red box), whereas empirical features show broader dispersion and a slightly lower mean (blue box). The extremely small p-value (8.996 × 10⁻²³) strongly supports the statistical significance of this difference, indicating that the observed variation is highly unlikely to occur by chance.

From an information-theoretic perspective, entropy quantifies the diversity or uncertainty within a distribution. The higher and more tightly clustered entropy of semantic embeddings suggests a more balanced and comprehensive encoding scheme, potentially enabling these embeddings to capture subtle semantic and contextual distinctions with greater precision. In contrast, empirical features display wider dispersion and lower average entropy, implying a narrower representational scope and a potential tendency toward biased or sparse encoding along certain dimensions. Collectively, these findings indicate that the richer and more evenly distributed information content of semantic embeddings contributes to their superior performance in downstream prediction and optimization tasks.

The entropy calculation was performed using the KernelDensity function from the scikit-learn Python package [4], combined with differential entropy estimation. The kernel density estimate (KDE) is computed as:


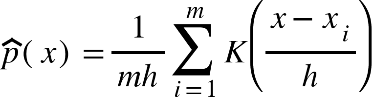


where:

- is the estimated density at point x.
- is the number of data points.
- are the observed data points.
- is the kernel function, a symmetric and usually bell-shaped function that integrates to one.
- is the bandwidth, a scaling factor that affects the smoothness of the resulting density curve. A smaller h results in a less smooth (more detailed) density estimate, while a larger h produces a smoother (more general) density estimate.

The differential entropy is then approximated using the KDE estimates:


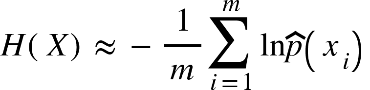


where are the density estimates derived from KDE's sample points.

**Elemental Embeddings for the Periodic Table:**

The 384-dimensional semantic embedding vectors for several common alloying elements are provided in Table S7. The complete set of embeddings for all elements in the periodic table is available on our GitHub repository [https://github.com/diegoxue/ElementBERT]. The embeddings are stored as torch.float32, offering a precision of approximately seven decimal digits. This precision level strikes an optimal balance between computational efficiency and numerical accuracy, ensuring reliable representation and processing across various downstream applications. The chosen precision also enhances numerical stability without introducing unnecessary computational overhead.

**Table S7.** Representative 384-dimensional semantic embedding vectors for selected alloying elements, extracted using ElementBERT. The complete set of embeddings for all elements in the periodic table is available on the project’s GitHub repository.

| **id** | **Al** | **Ti** | **V** | **Cr** | **Mn** | **Fe** | **Co** | **Ni** | **Cu** | **Zr** | **Nb** | **Mo** | **Pd** | **Hf** | **Ta** | **W** |
| --- | --- | --- | --- | --- | --- | --- | --- | --- | --- | --- | --- | --- | --- | --- | --- | --- |
| **1** | 0.121619 | 0.01926 | -0.30878 | 0.12811 | -0.1646 | 0.440471 | 0.640366 | 0.465391 | 0.428579 | -0.00232 | -0.06285 | 0.005611 | 0.251555 | -0.43263 | -0.41183 | 0.260463 |
| **2** | -0.01768 | -0.29036 | -0.5098 | 0.212521 | -0.32344 | -0.19937 | 0.28115 | 0.203358 | -0.10443 | 0.08484 | -0.2793 | 0.265144 | 0.097747 | -0.50584 | 0.198731 | -0.329 |
| **3** | 0.512698 | 0.248927 | 0.626814 | 0.608235 | 0.708678 | 0.636571 | 0.679524 | 0.631856 | 0.356256 | 0.023082 | -0.01901 | 0.618377 | 0.169763 | 0.752248 | 0.858806 | 0.799477 |
| **4** | 0.108367 | 0.006805 | -0.18539 | 0.325972 | -0.27626 | 0.029173 | 0.112774 | -0.04889 | 0.611061 | 0.432375 | 0.301373 | -0.05847 | 0.265818 | 0.637485 | 0.647627 | 0.632281 |
| **5** | -0.98687 | -1.32514 | -0.82068 | -0.90186 | -1.34175 | -1.43089 | -1.71648 | -1.31599 | -1.17802 | -1.30477 | -1.36963 | -1.30465 | -1.60153 | -0.76515 | -0.99581 | -0.89485 |
| **6** | -0.34661 | -0.68749 | -1.27652 | -0.35781 | -0.75914 | -0.43539 | -0.73834 | -0.36259 | -0.65188 | -0.51851 | 0.097684 | -0.20831 | -0.61605 | -1.14513 | -0.72683 | -1.30996 |
| **7** | -0.23808 | 0.312302 | -0.06161 | -0.72077 | 0.268548 | -0.67524 | -0.01954 | -0.41336 | -0.687 | -0.14046 | -0.07193 | -0.36467 | -0.32267 | -0.18228 | -0.52928 | -0.72911 |
| **8** | 0.713874 | 0.759755 | 0.818343 | 1.366125 | 1.394378 | 1.322589 | 1.412393 | 1.379712 | 1.088392 | 1.024274 | 0.840348 | 1.139397 | 1.11039 | 0.663564 | 0.971409 | 0.315192 |
| **9** | 1.282581 | 1.34262 | 0.295001 | 0.787843 | 0.685856 | 0.513779 | 0.800889 | 0.803545 | 1.050662 | 0.856201 | 0.620518 | 0.855043 | 0.754888 | 1.001894 | 0.531712 | 0.782472 |
| **10** | 0.592234 | 0.154512 | -0.13753 | -0.16707 | 0.47132 | 0.211954 | 0.27659 | -0.0017 | 0.35891 | 0.116245 | 0.101645 | -0.46476 | -0.1188 | -0.41459 | -0.19423 | -0.30669 |
| **11** | 0.356092 | 0.673184 | 0.487574 | 0.555044 | 0.338166 | 0.853748 | 0.561085 | 0.53677 | 0.544422 | 0.313592 | -0.00412 | 0.380355 | 0.608453 | 0.375699 | 0.498197 | 0.42225 |
| **12** | -0.58089 | -1.46256 | -1.82405 | -1.23742 | -1.29507 | -1.47192 | -1.61304 | -1.03865 | -1.32381 | -1.27081 | -0.9992 | -1.34301 | -1.16411 | -1.13637 | -1.34992 | -1.44208 |
| **13** | 1.25137 | 0.912077 | 1.128215 | 1.043534 | 1.232812 | 1.424935 | 0.743405 | 0.852861 | 1.071176 | 1.4678 | 0.617339 | 1.258039 | 0.801603 | 1.247755 | 1.270525 | 1.21234 |
| **14** | 0.908572 | 0.794152 | 1.135925 | 0.898855 | 1.21001 | 1.459343 | 0.981781 | 0.975591 | 1.059258 | 1.322296 | 1.272497 | 0.868974 | 1.378469 | 0.937188 | 0.967985 | 1.472436 |
| **15** | 0.331817 | 0.709421 | 0.669504 | 0.445414 | 0.6418 | -0.01429 | 0.23313 | 0.091843 | -0.24616 | 0.19932 | 0.350914 | 0.197833 | 0.022228 | 0.176114 | -0.30962 | 0.049269 |
| **16** | 0.349353 | 0.524439 | 0.958709 | 0.114709 | 0.0498 | 0.575343 | 0.199683 | 0.211724 | 0.970103 | 0.97428 | 1.005649 | 0.610585 | 1.572794 | 1.062711 | 0.61869 | 1.002803 |
| **17** | 1.661864 | 1.292547 | 0.547683 | 1.260892 | 1.052544 | 1.292929 | 1.41857 | 1.621675 | 1.345844 | 1.253542 | 0.948421 | 0.92881 | 1.299003 | 1.260353 | 1.110938 | 1.388845 |
| **18** | 1.102872 | 0.847047 | 0.215283 | 0.403695 | 0.301841 | 0.395025 | 0.1753 | 0.656419 | 0.605399 | 0.321734 | 0.242204 | 0.4031 | 0.201578 | 0.639076 | 0.063451 | 0.50318 |
| **19** | -1.80423 | -1.64667 | -1.63576 | -1.58477 | -1.70565 | -1.9304 | -1.76567 | -1.89958 | -1.89279 | -1.81521 | -0.99481 | -1.38634 | -1.41746 | -1.00179 | -0.97308 | -1.56701 |
| **20** | 0.905894 | 0.583662 | 0.560968 | 0.355398 | 1.001508 | 0.654329 | 0.773101 | 0.796369 | 0.724554 | 0.907793 | 0.454666 | 0.655522 | 0.818631 | 0.51392 | 0.395053 | 0.159589 |
| **21** | -0.84023 | -1.08249 | -1.31923 | -1.36547 | -0.89273 | -1.2248 | -0.867 | -1.12313 | -1.03799 | -0.75703 | -1.3137 | -1.06644 | -1.22878 | -1.08948 | -1.46752 | -1.52953 |
| **22** | 0.506724 | 0.320502 | 1.17393 | 0.925353 | 0.292699 | 1.021345 | 0.675811 | 0.859411 | 0.834857 | 0.41271 | 0.531076 | 0.738402 | 0.167023 | 0.687054 | 0.478891 | 1.315246 |
| **23** | 0.311368 | 0.685487 | 1.037282 | 0.090294 | 0.476738 | 1.075888 | 0.642251 | 0.876775 | 0.587675 | 0.56795 | 0.439567 | 0.674419 | 0.380279 | 0.539056 | 0.884422 | 0.816225 |
| **24** | -3.9083 | -4.48939 | -3.4526 | -3.46185 | -3.86304 | -4.13696 | -4.37137 | -4.03238 | -4.38549 | -3.80408 | -3.18835 | -3.70211 | -2.87311 | -3.71697 | -3.89484 | -4.49256 |
| **25** | 0.446578 | 0.55238 | -0.21554 | -0.24737 | 0.024125 | -0.10302 | 0.406353 | -0.18265 | 0.091244 | 0.380102 | 0.779587 | 0.057499 | 0.077014 | 0.359698 | 0.111634 | 0.223087 |
| **26** | 0.78279 | 0.277289 | 0.157645 | 0.639806 | 0.486676 | 0.073049 | 0.57398 | 0.382196 | 0.8115 | 0.428021 | 0.636197 | 0.388438 | 0.720443 | 0.604715 | 0.620286 | 0.562609 |
| **27** | 0.856145 | 1.067417 | 0.873181 | 0.925221 | 0.994565 | 0.770075 | 1.066575 | 1.119885 | 0.947151 | 0.873522 | 0.881968 | 1.240117 | 0.468522 | 0.209014 | 0.497811 | 1.081391 |
| **28** | -1.46365 | -1.43701 | -1.33201 | -1.2244 | -1.29616 | -1.08516 | -1.00383 | -1.04994 | -1.33979 | -1.60345 | -0.48415 | -1.44019 | -0.93752 | -1.42422 | -1.39398 | -1.48661 |
| **29** | 0.892604 | 0.855607 | 0.073153 | 0.884433 | 1.158502 | 1.173568 | 0.904985 | 0.892624 | 1.017643 | 0.484204 | 0.403318 | 0.964869 | 0.777539 | 0.147069 | -0.10402 | -0.30693 |
| **30** | 0.985224 | 0.402169 | 0.888411 | 1.310382 | 0.67478 | 0.835023 | 1.23172 | 1.205145 | 1.172373 | 0.803304 | 0.070348 | 0.83822 | 1.268771 | 0.617549 | 0.631972 | 0.886941 |
| **31** | 1.119673 | 0.846646 | 0.38738 | 1.390609 | 0.763261 | 0.640739 | 0.902476 | 0.723778 | 0.945643 | 0.958342 | 0.631494 | 0.783337 | 1.001964 | 0.649996 | 0.211239 | 0.278661 |
| **32** | 0.278491 | 0.225122 | -0.17622 | -0.06218 | 0.341354 | -0.12696 | 0.102265 | 0.189029 | 0.887194 | 0.385975 | 0.92432 | -0.07756 | 0.260571 | 0.083468 | 0.273526 | 0.132722 |
| **33** | 0.362679 | 0.652184 | 0.44812 | 0.117666 | -0.13981 | -0.12005 | -0.10471 | 0.325909 | 0.261009 | -0.00111 | -0.20481 | 0.229937 | 0.657207 | 0.106666 | -0.02646 | 0.050672 |
| **34** | -0.70845 | -0.77069 | -0.45105 | -0.57055 | -0.68094 | -1.01499 | -0.56491 | -0.70298 | -0.68051 | -1.15076 | -0.55639 | -0.70261 | -0.34952 | -0.56319 | -0.56484 | -0.4234 |
| **35** | -0.82158 | -1.14774 | -1.43452 | -1.33686 | -1.07262 | -1.30152 | -1.29754 | -1.40579 | -1.13963 | -0.80569 | -0.689 | -1.6959 | -1.2402 | -0.95368 | -1.0434 | -1.95344 |
| **36** | 0.499668 | -0.06078 | 0.30947 | 0.332059 | -0.3183 | -0.02189 | 0.067101 | 0.341906 | 0.228599 | 0.654053 | 0.416715 | 0.211553 | 0.154024 | 1.142028 | 0.544714 | 0.594075 |
| **37** | 1.231652 | 1.368058 | 0.633565 | 1.64647 | 1.522827 | 1.337588 | 1.760883 | 1.513172 | 1.303924 | 1.553297 | 1.283621 | 1.257788 | 1.381717 | 1.794222 | 1.367304 | 1.079976 |
| **38** | 1.349495 | 0.615441 | 0.430685 | 0.106033 | 0.561173 | 1.049013 | 0.774601 | 0.419349 | 0.58747 | 0.667596 | 0.595047 | 0.31042 | 0.106897 | -0.03033 | 0.388066 | 0.192637 |
| **39** | 0.00068 | 0.67943 | 0.143643 | -0.27198 | -0.23783 | 0.12641 | -0.25857 | 0.118431 | -0.05451 | -0.10022 | 0.023421 | 0.569123 | -0.13331 | 0.46245 | 0.374682 | 0.528738 |
| **40** | -0.4502 | -0.51157 | -0.96436 | -0.49913 | -0.93568 | -0.74975 | -0.98567 | -0.71474 | -0.9596 | -0.64859 | -0.97548 | -0.678 | -1.74082 | -0.49224 | -1.04383 | -0.40198 |
| **41** | 2.018228 | 1.961961 | 0.71731 | 1.160584 | 1.53095 | 1.654035 | 1.798662 | 0.81498 | 1.674303 | 1.5554 | 1.558639 | 1.103915 | 1.715992 | 0.421476 | 0.524273 | 0.67198 |
| **42** | -0.82747 | -0.8161 | -0.11595 | -0.64287 | -0.31018 | -0.71914 | -0.82875 | -0.49318 | -0.84358 | 0.030067 | -0.44823 | -0.09613 | -0.25565 | -0.29869 | -0.4102 | -0.51985 |
| **43** | 0.665474 | 0.984203 | 1.231618 | 0.711059 | 0.936275 | 1.554935 | 1.593412 | 1.523896 | 0.947492 | 0.749822 | 0.637129 | 1.483342 | 0.922875 | 0.976058 | 0.85379 | 1.486486 |
| **44** | 0.612233 | 0.855832 | 0.214427 | 0.725594 | 0.5473 | 0.775054 | 0.579425 | 0.958481 | 1.163293 | 0.301729 | 0.646407 | 0.984162 | 0.490862 | 1.023129 | 0.877169 | 0.926806 |
| **45** | -1.20458 | -1.5637 | -1.42286 | -1.15351 | -1.2338 | -0.67258 | -1.24129 | -0.71539 | -0.65222 | -1.1102 | -1.14953 | -1.55441 | -0.5006 | -1.11548 | -1.39756 | -1.18904 |
| **46** | 0.151148 | 0.477013 | 0.49979 | 1.159944 | 1.181129 | 0.831508 | 0.599955 | 1.166083 | 0.665007 | 1.052884 | 0.810705 | 0.985044 | 1.150581 | 0.807352 | 0.32805 | 0.612421 |
| **47** | 0.233994 | -0.22132 | -0.50425 | -0.11649 | -0.25519 | -0.28479 | -0.02264 | -0.10886 | 0.356716 | -0.10044 | -0.46847 | -0.38776 | -0.43659 | -0.30032 | -0.37048 | 0.201209 |
| **48** | -1.79347 | -1.0134 | -1.06925 | -1.21182 | -1.23349 | -1.44068 | -1.13008 | -1.25578 | -1.5267 | -1.40855 | -1.03812 | -1.39233 | -0.30756 | -1.01563 | -1.3002 | -1.60712 |
| **49** | -0.94469 | -0.75276 | -0.72381 | -0.62316 | -0.52334 | -0.69645 | -0.66155 | -0.32636 | -1.02002 | -1.05406 | -0.81701 | -0.71188 | -0.72175 | -0.88656 | -0.71707 | -0.6925 |
| **50** | -0.40269 | -0.38804 | -0.12322 | -0.37982 | -0.20913 | -0.27272 | -0.52285 | -0.68956 | -0.54428 | -0.41123 | -0.63456 | -0.659 | -0.45183 | -0.69797 | -0.34704 | -0.48726 |
| **51** | 1.326979 | 0.866471 | 0.533711 | 0.472656 | 0.488343 | 0.805278 | 0.419294 | 0.439427 | 0.731384 | 0.125019 | 1.153512 | -0.05543 | 0.480025 | 0.319868 | 0.594038 | 1.022929 |
| **52** | -1.69003 | -1.8027 | -1.52855 | -1.46414 | -2.13269 | -1.89877 | -1.54036 | -1.639 | -1.90217 | -1.65194 | -1.82102 | -1.37859 | -1.4699 | -0.98899 | -1.25094 | -1.36595 |
| **53** | 0.20244 | 0.36014 | 0.588949 | 0.538531 | 0.740071 | 0.460561 | 0.428922 | 0.140866 | 0.498261 | 0.625685 | 0.877403 | 0.237293 | 0.58177 | -0.44803 | 0.150812 | 0.263621 |
| **54** | -1.32795 | -0.75885 | -0.93502 | -0.50855 | -0.56009 | -0.63444 | -0.28172 | -0.68148 | -0.33465 | -0.44505 | -0.23929 | -0.74167 | -0.16854 | -0.82784 | -0.39746 | -0.55751 |
| **55** | -1.13853 | -1.14329 | -1.07243 | -1.16557 | -0.9358 | -0.88588 | -0.80635 | -1.03168 | -1.22363 | -1.0821 | -1.2182 | -0.97705 | -0.97362 | -1.50876 | -1.41516 | -0.82306 |
| **56** | -0.62145 | -0.43852 | -0.74039 | -0.77329 | -0.78377 | -0.49931 | -0.52356 | -0.97012 | -1.21226 | -0.90783 | -0.75369 | -0.81291 | -0.96322 | -0.6771 | -0.7951 | -0.78605 |
| **57** | -0.12103 | -0.20518 | -0.19068 | 0.274711 | -0.43627 | 0.331356 | 0.306319 | 0.471279 | 0.417548 | -0.25156 | -0.39227 | -0.34445 | 0.304301 | -0.00656 | 0.320993 | -0.05508 |
| **58** | -1.1742 | -0.95693 | -1.40685 | -1.15632 | -0.82652 | -1.24432 | -1.00969 | -0.86107 | -0.93499 | -1.06982 | -0.5079 | -1.16628 | -1.27546 | -0.66268 | -0.64263 | -1.27189 |
| **59** | -0.13654 | -0.11971 | 0.031761 | 0.643338 | 0.389058 | 0.124118 | 0.667616 | -0.33417 | 0.285442 | -0.12684 | -0.52903 | -0.03029 | 0.521749 | -0.60475 | -0.09288 | -0.26913 |
| **60** | -0.62065 | -0.94934 | -0.85825 | -1.0487 | -1.09874 | -1.00625 | -0.91282 | -0.53103 | -0.91501 | -0.56617 | -0.77863 | -0.86169 | -0.44454 | -0.62539 | -1.41805 | -1.292 |
| **61** | 1.218207 | 0.70142 | 1.629722 | 1.012367 | 1.027175 | 0.882966 | 0.672315 | 0.787443 | 1.058913 | 0.537524 | 1.337184 | 0.585837 | 0.856991 | 1.440058 | 1.441987 | 1.380132 |
| **62** | -2.26961 | -1.66445 | -1.0569 | -1.28672 | -1.38687 | -1.1332 | -0.81735 | -1.42852 | -1.53997 | -1.34815 | -1.27776 | -1.65516 | -0.81886 | -1.5809 | -1.52022 | -1.47662 |
| **63** | 0.154855 | 0.442369 | 0.744263 | 0.100722 | 0.257912 | 0.143538 | 0.652025 | 0.335288 | 0.420048 | 0.421698 | 0.481077 | 0.780493 | 1.136335 | 0.757548 | 0.25123 | 0.586261 |
| **64** | 0.543839 | 1.203299 | 0.467479 | 1.459026 | 1.270872 | 0.769654 | 1.450287 | 1.125915 | 0.914349 | 0.483851 | 0.799907 | 0.834809 | 1.467093 | 0.980976 | 0.424252 | 0.188101 |
| **65** | 0.719497 | 0.458856 | 0.166584 | 0.069992 | -0.46098 | 0.174404 | -0.17555 | 0.042285 | 0.589107 | 0.443151 | 0.626759 | -0.16932 | 0.488726 | 0.11246 | 0.338921 | 0.313403 |
| **66** | 0.138133 | 0.706497 | 0.66627 | 0.541219 | 0.520336 | 0.623744 | 0.845271 | 0.814601 | 0.33315 | 1.341198 | 1.0685 | 0.821734 | 0.927369 | 0.575091 | 0.285953 | 0.362885 |
| **67** | -0.08127 | 0.246935 | -0.06809 | -0.6279 | -0.2337 | -0.2334 | -0.4381 | -0.13485 | -0.22651 | 0.198935 | -0.00667 | -0.02515 | -0.09618 | 0.056305 | -0.53841 | 0.495313 |
| **68** | 0.101954 | 0.155223 | -0.14856 | -0.32202 | -0.24431 | 0.28414 | -0.06425 | 0.106162 | -0.23227 | 0.254313 | -0.21224 | 0.068228 | -0.29292 | 0.219678 | 0.048489 | 0.090962 |
| **69** | 0.253828 | 0.24193 | -0.03138 | -0.27394 | 0.022736 | 0.023879 | -0.47617 | -0.07119 | 0.070317 | -0.21517 | -0.31468 | -0.05279 | -0.50627 | 0.017286 | -0.16577 | -0.46196 |
| **70** | 0.425443 | 0.578308 | -0.16332 | 0.009408 | -0.11872 | 0.331424 | 0.175864 | 0.049364 | 0.485785 | 0.35381 | 0.000522 | 0.033679 | -0.26121 | 0.382838 | 0.30431 | 0.425281 |
| **71** | -0.43142 | 0.040821 | -0.56048 | -0.44287 | -0.86939 | -0.49693 | -0.64351 | -0.79097 | -0.66959 | 0.029462 | 0.081376 | -0.06546 | -0.24753 | 0.297504 | -0.12417 | 0.013608 |
| **72** | -0.67368 | -0.54388 | -0.2439 | 0.246212 | -0.49619 | 0.333563 | 0.305535 | -0.25799 | 0.287022 | -0.18558 | -0.63121 | -0.25932 | -0.23122 | -0.5129 | 0.215244 | -0.10536 |
| **73** | 0.412227 | 0.843543 | -0.11648 | 0.010468 | -0.05608 | 0.71633 | 0.248042 | 0.542875 | 0.512287 | 0.695958 | -0.15839 | 0.376344 | 0.340935 | 0.339476 | -0.01381 | 0.289707 |
| **74** | -0.697 | -0.41197 | -1.31165 | -1.18917 | -1.49221 | -1.70751 | -1.30023 | -1.34592 | -1.19125 | -1.15616 | -1.21312 | -1.00615 | -1.8406 | -0.89657 | -0.97271 | -2.04963 |
| **75** | -0.30643 | 0.012621 | -0.67402 | -0.49276 | -0.79192 | -0.74241 | -0.69809 | -0.4499 | -0.72103 | -0.56202 | -0.69765 | -0.43694 | -0.70275 | -0.5611 | -0.32549 | -0.41892 |
| **76** | -5.12162 | -5.25579 | -4.88331 | -4.79674 | -5.10256 | -5.24222 | -4.29356 | -4.6367 | -4.93669 | -4.69598 | -4.65923 | -5.21254 | -3.59389 | -4.02476 | -4.95021 | -5.11162 |
| **77** | 0.134052 | 0.227917 | 0.006982 | 0.136055 | 0.118116 | 0.097455 | -0.06732 | 0.023453 | 0.2197 | -0.21775 | -0.22913 | -0.05788 | -0.12468 | 0.573413 | 0.231462 | 0.009914 |
| **78** | 0.78308 | 0.383378 | 0.246549 | 0.122519 | -0.06572 | 0.056325 | -0.06588 | 0.101001 | 0.47925 | -0.33607 | 0.540301 | 0.036803 | 0.21859 | 0.09249 | 0.356045 | 0.569905 |
| **79** | -0.61494 | -0.09581 | -0.98693 | -0.43062 | -0.05122 | -0.50118 | 0.167215 | -0.27058 | -0.40095 | -0.5117 | -0.18966 | 0.142756 | -0.15414 | 0.400038 | -0.0194 | -0.36567 |
| **80** | -0.90226 | -0.27622 | -0.80251 | -0.78151 | -0.52336 | -0.76745 | -0.81595 | -1.18261 | -1.02011 | -1.12004 | -1.08352 | -0.43309 | -0.89762 | -1.02396 | -1.1277 | -1.03454 |
| **81** | -0.10781 | -0.00106 | 0.392552 | 0.407781 | 0.625048 | 0.180934 | 0.07729 | -0.4046 | -0.62138 | -0.05006 | -0.46528 | -0.5007 | 0.028278 | 0.116262 | -0.32077 | -0.51537 |
| **82** | -1.77048 | -2.07053 | -1.34775 | -1.35623 | -0.9887 | -1.93115 | -1.23569 | -2.04766 | -1.54311 | -1.3479 | -1.57399 | -1.97235 | -1.22813 | -2.38513 | -1.62505 | -2.27006 |
| **83** | -0.4671 | -0.54595 | 0.078939 | -0.17648 | 0.054168 | -0.10325 | 0.008221 | -0.43687 | -0.49026 | -0.1677 | 0.028755 | -0.01357 | 0.32454 | 0.093481 | -0.20034 | -0.24085 |
| **84** | 0.012977 | 0.150016 | -0.0495 | -0.39684 | 0.503314 | 0.348712 | 0.110679 | 0.426724 | 0.304593 | 0.118486 | 0.503914 | -0.2171 | 0.141235 | 0.031666 | -0.06411 | 0.277742 |
| **85** | 1.378704 | 1.965382 | 2.182108 | 2.03228 | 2.072007 | 1.639838 | 2.518461 | 1.96657 | 1.618152 | 2.196108 | 2.061486 | 2.478997 | 1.880002 | 2.006674 | 2.168423 | 1.613393 |
| **86** | -0.44328 | -0.38092 | 0.618157 | 0.465032 | 0.586433 | -0.06892 | 0.400509 | 0.268225 | -0.45715 | -0.11792 | -0.35218 | 0.230124 | 0.310272 | 0.605519 | -0.22698 | 0.030687 |
| **87** | -0.48927 | -0.64517 | -0.50037 | -0.54179 | 0.174659 | -0.21779 | -0.22533 | -0.38099 | -0.22989 | -0.95771 | -0.466 | -0.70797 | -0.39281 | -1.09487 | -1.24771 | -0.68622 |
| **88** | -0.26968 | -0.23205 | 0.063271 | -0.30848 | -0.0316 | 0.006974 | -0.29235 | -1.01781 | -0.26312 | -0.49213 | 0.158299 | -0.54073 | -0.38619 | -1.15365 | -0.21072 | 0.021637 |
| **89** | -1.04663 | -0.91182 | -0.9986 | -1.25996 | -1.09008 | -0.64213 | -0.86696 | -1.03768 | -0.91098 | -1.05015 | -1.08325 | -1.44423 | -1.2286 | -1.69555 | -1.22077 | -0.96724 |
| **90** | 0.912075 | 1.029738 | 1.454838 | 1.001519 | 1.219376 | 1.075798 | 0.870548 | 0.879752 | 1.045014 | 1.290501 | 1.045062 | 0.688791 | 1.643528 | 1.317452 | 0.809769 | 0.925377 |
| **91** | -0.94748 | -0.42762 | -0.52669 | -0.47666 | -0.88554 | -0.38319 | 0.055538 | -0.53862 | -0.03213 | -0.75952 | -0.42671 | -0.0586 | -0.41365 | 0.003324 | 0.465343 | -0.04791 |
| **92** | 1.999066 | 1.806939 | 1.291224 | 2.700801 | 2.465564 | 2.193163 | 2.242204 | 2.562968 | 2.290677 | 1.828024 | 1.646468 | 1.977463 | 2.637497 | 2.095601 | 1.749129 | 1.582008 |
| **93** | -0.21162 | -0.2646 | 0.28775 | 0.190656 | 0.486038 | -0.39 | -0.24787 | -0.33332 | -0.21164 | -0.29885 | -0.31215 | -0.0739 | 0.042386 | -0.265 | -0.24591 | 0.092259 |
| **94** | -0.66523 | -0.51682 | -0.71165 | -0.79669 | -0.34737 | -0.7566 | -1.36795 | -0.97851 | -0.83046 | -1.10282 | -0.97963 | -0.65158 | -1.4066 | -1.04809 | -0.58588 | -0.7302 |
| **95** | -0.09993 | -0.16089 | -0.29851 | -0.12416 | -0.29762 | -0.14884 | -0.20549 | -0.27063 | 0.066164 | 0.041931 | 0.186744 | -0.22328 | 0.279166 | -0.18724 | -0.63105 | -0.65272 |
| **96** | 0.819575 | -0.28935 | 0.591739 | 0.899342 | 0.510782 | 0.672705 | 0.413015 | 0.833366 | 0.833439 | 0.674188 | 0.304575 | 0.759957 | 0.120128 | 0.132144 | 0.457783 | 0.58757 |
| **97** | -0.40382 | -0.2376 | -0.60778 | -0.12404 | -0.09622 | -0.26968 | -0.32198 | -0.56867 | -0.50968 | -0.52817 | -0.47216 | -0.72323 | 0.241192 | -0.2268 | -0.41206 | -0.32579 |
| **98** | -0.65171 | -0.61988 | -0.63813 | -0.88679 | -0.60496 | -0.65054 | -0.85258 | -0.97529 | -1.03124 | -1.44685 | -0.59575 | -0.62881 | -1.20554 | -1.23385 | -0.43899 | -0.40468 |
| **99** | -0.68068 | -0.51905 | -0.84737 | -0.47303 | -0.73309 | -0.4852 | -0.54704 | -0.63903 | -0.32665 | 0.011769 | -0.31879 | -0.61286 | -0.88562 | -0.65966 | 0.058357 | -0.42136 |
| **100** | 0.012101 | -0.27624 | -0.46493 | 0.020958 | 0.236879 | -0.63692 | -0.25047 | -0.19432 | -0.2176 | 0.076955 | 0.128149 | -0.27676 | -0.19546 | -0.40919 | -0.5782 | -0.55543 |
| **101** | -0.8969 | -1.0152 | -0.75314 | -0.92193 | -0.60433 | -0.27216 | -0.52395 | -0.4621 | -0.5565 | -0.77988 | -1.14603 | -1.0517 | -0.29472 | -1.16746 | -1.41737 | -0.98173 |
| **102** | 0.377125 | 0.592499 | -0.05409 | -0.18827 | 0.123817 | 0.176007 | 0.450905 | 0.063308 | 0.243569 | -0.05098 | -0.2434 | 0.356967 | 0.136911 | -0.29425 | 0.014061 | -0.22545 |
| **103** | -0.01701 | 0.045442 | -0.01201 | -0.361 | 0.587511 | 0.095752 | 0.378077 | -0.05399 | -0.27274 | -0.52225 | -0.50754 | -0.14414 | 0.286598 | -0.14863 | -0.45688 | -0.09162 |
| **104** | -0.22917 | -0.29386 | -0.03367 | 0.431719 | 0.633572 | -0.14289 | -0.45038 | 0.177526 | -0.014 | -0.48859 | -0.00477 | 0.042032 | 0.374084 | 0.155447 | 0.01539 | -0.40126 |
| **105** | -0.85903 | -0.56403 | -1.29815 | -1.86125 | -1.36231 | -1.30923 | -1.64648 | -1.82953 | -1.12916 | -1.29072 | -0.93573 | -1.78969 | -1.75209 | -1.27586 | -1.22896 | -1.26777 |
| **106** | 0.49418 | 0.786054 | 0.534576 | 1.268075 | 0.952722 | 0.37943 | 0.986395 | 0.91881 | 0.841704 | 1.431735 | 1.767774 | 1.053251 | 1.1514 | 0.981871 | 0.711007 | 0.202544 |
| **107** | -1.28515 | -1.43894 | -1.45281 | -1.37006 | -1.39069 | -1.45341 | -0.97392 | -1.04855 | -0.93922 | -1.97759 | -1.66267 | -1.70165 | -1.56511 | -1.64184 | -1.35741 | -1.20926 |
| **108** | 0.637896 | 0.867114 | 1.132137 | 0.868157 | 0.529532 | 0.853041 | 0.648332 | 0.672524 | 0.965208 | 1.176837 | 1.547841 | 1.120937 | 1.126013 | 0.885218 | 1.258723 | 0.99827 |
| **109** | 1.032247 | 0.3239 | 0.6457 | 0.132914 | 0.539841 | 0.047647 | 0.009936 | 0.97471 | 0.495447 | 0.502917 | 0.688839 | 0.187162 | 0.982244 | -0.12495 | -0.11063 | 0.158986 |
| **110** | -0.56797 | -0.75522 | -0.59446 | -0.61468 | -0.14374 | -0.04738 | -0.4538 | -0.25034 | -0.30333 | -0.51225 | -0.53895 | -0.29728 | -0.81116 | -0.43448 | -0.9772 | -0.63937 |
| **111** | -0.44353 | -0.51042 | 0.379741 | 0.185321 | 0.289366 | 0.140516 | 0.163114 | 0.015126 | -0.49914 | 0.034004 | -0.16891 | 0.39949 | -0.31837 | 0.31333 | 0.08091 | -0.08093 |
| **112** | 0.376975 | 1.44879 | 0.862423 | 0.548977 | 0.319212 | 0.141812 | 0.137749 | 0.314412 | 0.628994 | 0.956416 | 0.744672 | 0.683392 | 0.305761 | 0.864284 | 1.456315 | 0.625055 |
| **113** | 0.023413 | 0.145875 | 0.395251 | 0.094539 | 0.524819 | 0.163183 | 0.224379 | 0.2342 | -0.03561 | 0.255889 | -0.10104 | -0.10806 | 0.15227 | -0.22314 | -0.76965 | 0.077912 |
| **114** | 0.27565 | -0.27406 | -0.04435 | 0.085145 | 0.605431 | 0.767351 | 0.546192 | -0.02286 | -0.51191 | -0.00922 | -0.18832 | 0.109064 | -0.53031 | 0.035906 | 0.27684 | -0.16927 |
| **115** | -0.65981 | -0.17401 | -0.56274 | -0.47621 | -0.09906 | -0.83945 | -0.52315 | -0.03892 | -0.67101 | 0.123393 | -0.40639 | 0.005003 | -0.10978 | 0.649025 | -0.62717 | -0.54843 |
| **116** | -0.59602 | 0.25137 | -0.54515 | -0.45684 | -0.3117 | -0.31983 | -1.05519 | -0.43828 | -0.47935 | 0.259382 | 0.335393 | -0.07668 | -0.72236 | -0.32898 | -0.70315 | -0.60689 |
| **117** | -0.11142 | 0.369353 | 0.351998 | 0.157067 | 0.908022 | 0.643414 | 1.07132 | 0.943708 | 1.010545 | 0.599656 | 0.270759 | 0.205277 | 1.310851 | -0.073 | -0.61819 | 0.314495 |
| **118** | 0.698592 | 0.775316 | 1.565375 | 0.710837 | 0.69074 | 0.988574 | 1.030551 | 0.967763 | 1.191882 | 0.617857 | 0.852209 | 0.808958 | 1.479591 | 1.002831 | 1.300799 | 1.562035 |
| **119** | -1.48485 | -1.25954 | -1.37261 | -1.65211 | -1.3129 | -1.29641 | -1.04908 | -1.77676 | -1.67552 | -1.25805 | -0.90872 | -1.14113 | -0.43186 | -1.11688 | -1.49639 | -1.73666 |
| **120** | -0.76251 | -0.56114 | -0.91471 | -1.18484 | -1.36195 | -1.05141 | -1.22349 | -1.03148 | -1.17558 | -0.97773 | -0.69548 | -0.7369 | -0.7887 | -0.19157 | -0.34323 | -0.30353 |
| **121** | -1.08415 | -0.88658 | -1.16874 | -0.85074 | -0.72525 | -0.87688 | -0.61434 | -0.48458 | -0.76972 | -1.28891 | -0.94188 | -0.80918 | -1.06236 | -0.6289 | -0.55471 | -0.74288 |
| **122** | 0.076242 | 0.173225 | 0.337614 | 0.839499 | 0.422443 | 0.288111 | 0.601903 | 0.709017 | 0.985442 | 0.419285 | 0.140915 | 0.724731 | 0.807232 | 0.19102 | 0.338818 | 0.51607 |
| **123** | -0.97106 | -1.05746 | -0.5044 | -0.66777 | -0.81099 | -0.64394 | -0.78512 | -0.48037 | -0.74821 | -0.3706 | -0.8943 | -0.42314 | -0.52921 | -0.64294 | -0.70727 | -0.49076 |
| **124** | 1.285645 | 1.221105 | 1.357498 | 1.523865 | 1.571445 | 1.466274 | 1.072046 | 1.202504 | 1.112556 | 0.941004 | 2.047923 | 1.366012 | 1.385074 | 1.38745 | 1.009807 | 1.516016 |
| **125** | -0.15109 | -0.5109 | 0.343243 | -0.57317 | -0.57796 | 0.026024 | -0.38576 | -0.51228 | -0.38532 | -0.1201 | -0.81989 | -0.48116 | -0.62459 | -0.23191 | 0.061456 | 0.486543 |
| **126** | -1.28857 | -1.64773 | -2.03122 | -1.70879 | -1.78633 | -2.41215 | -1.99603 | -2.0426 | -2.33874 | -1.396 | -1.4367 | -1.51027 | -1.66106 | -1.40459 | -1.8702 | -1.89752 |
| **127** | -0.01944 | -0.08548 | 0.454078 | 0.304453 | -0.12302 | 0.241288 | 0.289272 | -0.07664 | 0.385669 | -0.25752 | 0.187861 | 0.250252 | 0.263083 | -0.436 | -0.0811 | 0.712705 |
| **128** | -0.31452 | 0.027799 | -0.06352 | -0.14723 | 0.082689 | -0.11121 | 0.561879 | 0.438309 | 0.233039 | -0.08916 | -0.49534 | -0.2956 | -0.18053 | 0.153326 | -0.21637 | 0.257089 |
| **129** | 1.561455 | 1.63667 | 1.839898 | 1.465799 | 1.476302 | 0.816839 | 1.109157 | 0.992013 | 1.102473 | 1.14065 | 1.769054 | 1.330491 | 1.567999 | 1.216113 | 1.42402 | 1.932121 |
| **130** | 0.139669 | -0.25245 | -0.42017 | 0.276979 | 0.212811 | 0.193882 | 0.231122 | 0.249089 | -0.16784 | -0.4112 | -0.95214 | 0.217241 | -0.4331 | -0.65075 | -0.79631 | -0.60983 |
| **131** | 0.100872 | 0.620973 | 0.558381 | 0.071642 | 0.201984 | 0.159475 | 0.245113 | 0.260002 | 0.379588 | -0.31911 | -0.04161 | 0.287753 | 0.05585 | -0.2108 | -0.32262 | 0.431362 |
| **132** | -0.13614 | -0.5178 | -0.28938 | 0.275383 | -0.48316 | -0.40076 | -0.37027 | -0.03189 | 0.098618 | 0.066641 | -0.3684 | -0.40935 | 0.177408 | -0.24163 | -0.06511 | -0.40008 |
| **133** | -0.23782 | 0.004904 | 0.380831 | 0.110256 | 0.287222 | 0.32013 | -0.0391 | -0.18825 | -0.08907 | 0.123134 | 0.747524 | 0.311196 | -0.05934 | 0.294047 | 0.403811 | 0.027955 |
| **134** | 0.763809 | 1.102021 | 0.658403 | 1.068172 | 1.024873 | 1.311183 | 0.646017 | 0.544906 | 0.773571 | 0.849597 | 1.122666 | 1.28381 | 0.953214 | 0.314901 | 0.360525 | 0.390797 |
| **135** | 1.810269 | 1.504206 | 2.042106 | 1.33424 | 1.612047 | 1.528824 | 1.254504 | 1.184762 | 1.190341 | 1.532287 | 1.555917 | 1.69893 | 1.601806 | 1.60628 | 1.519439 | 1.637055 |
| **136** | -0.6506 | -0.39532 | -0.74976 | -1.36126 | -1.15097 | -0.21587 | -0.97911 | -0.64551 | -0.02161 | -0.20744 | -0.53634 | -0.57098 | -0.96155 | -0.32784 | -0.04339 | -0.32194 |
| **137** | -0.50546 | -1.08868 | 0.412841 | -0.55968 | -0.30347 | -0.85317 | -0.50413 | -0.40194 | -1.04536 | -0.74096 | -1.07834 | -0.40568 | -0.90608 | -0.5753 | -0.32148 | -0.02503 |
| **138** | -0.54346 | -0.56495 | -0.57057 | -0.98934 | -0.10311 | -1.06033 | -0.93995 | -0.91701 | -0.69598 | -0.6189 | -0.21431 | -0.71896 | -0.75331 | -0.63221 | -0.59166 | -0.86397 |
| **139** | -0.53504 | -0.68828 | 0.143789 | -0.18942 | 0.078991 | -0.53012 | -0.38001 | -0.74823 | -0.92735 | -0.67445 | -0.13639 | -0.4443 | -0.36795 | -0.72847 | -0.11169 | -0.69791 |
| **140** | -0.47395 | -0.85126 | -0.85391 | 0.094009 | -0.65133 | -0.02952 | -1.03953 | -0.19569 | -0.26344 | -0.70672 | -0.66635 | -0.71004 | -0.54607 | -0.4249 | -0.47207 | -0.71638 |
| **141** | -0.78747 | -1.01843 | -1.0011 | -0.29651 | -0.86795 | -0.82383 | -0.75644 | -0.88209 | -0.79991 | -1.25739 | -0.68381 | -0.91251 | -1.01262 | -1.54607 | -1.14157 | -1.12648 |
| **142** | 0.623815 | 0.015312 | 0.578108 | 0.137234 | 0.138895 | -0.13427 | 0.223751 | 0.567389 | 0.152591 | 0.276621 | -0.22216 | -0.0085 | 0.59177 | 0.443341 | 0.234225 | 0.436252 |
| **143** | -1.42212 | -0.95748 | -0.38711 | -0.35933 | -0.6749 | -0.9758 | -0.42213 | -0.63078 | -0.41434 | -0.61346 | -0.57355 | -0.36855 | -0.14195 | -0.33695 | -0.38586 | -0.29916 |
| **144** | -0.59539 | -0.66138 | -0.56255 | -1.14962 | -1.29521 | -1.12337 | -0.70731 | -0.9477 | -0.62157 | -1.31319 | -1.21247 | -0.54595 | -1.34835 | -0.31634 | -0.05036 | 0.120251 |
| **145** | 0.91713 | 0.959925 | 1.041203 | 1.112142 | 0.989007 | 1.457962 | 0.803803 | 1.247159 | 1.478552 | 0.58333 | 0.891432 | 0.953619 | 0.682118 | 0.979275 | 0.747865 | 1.25761 |
| **146** | 0.431384 | -0.21109 | -0.07841 | -0.24989 | 0.615684 | 0.458181 | 0.637753 | 0.452646 | 0.484601 | -0.14479 | -0.10516 | 0.707846 | 0.318753 | -0.30438 | -0.25569 | 0.088337 |
| **147** | 1.894696 | 1.285321 | 2.471152 | 2.1007 | 1.807967 | 2.18429 | 2.04733 | 1.60398 | 1.770871 | 1.808923 | 1.524076 | 1.699335 | 2.214759 | 1.53984 | 1.732695 | 2.136026 |
| **148** | 0.340541 | 0.023727 | -0.22494 | -0.45072 | -0.29715 | -0.32314 | -0.50524 | -0.0768 | 0.044331 | 0.335848 | 0.246551 | -0.30404 | 0.472557 | 0.207712 | -0.26137 | -0.2594 |
| **149** | 1.224515 | 0.35793 | 1.247563 | 0.717685 | 0.974664 | 1.231992 | 1.297637 | 0.652663 | 1.422958 | 0.810192 | 1.658841 | 0.154053 | 1.940817 | 1.298289 | 0.892709 | 1.162435 |
| **150** | 1.653056 | 2.048277 | 2.126129 | 1.642992 | 1.693277 | 1.771779 | 2.28192 | 2.138313 | 1.871941 | 1.828789 | 1.386824 | 2.114547 | 1.626459 | 2.534732 | 2.340182 | 2.41105 |
| **151** | -0.88208 | -0.96939 | -0.90316 | -0.86956 | -1.00861 | -1.11203 | -1.10646 | -0.90602 | -1.07307 | -1.23331 | -1.11602 | -0.60586 | -1.12719 | -1.07165 | -1.13861 | -0.82104 |
| **152** | -0.40649 | -0.83781 | -0.73271 | -0.49591 | -0.65753 | -0.42955 | -0.42538 | 0.057 | -0.66695 | -0.42987 | -0.20403 | -0.55398 | -0.04526 | -1.03939 | -0.86682 | -0.68612 |
| **153** | 1.220773 | 1.337087 | 1.527059 | 1.364585 | 1.165343 | 1.312185 | 1.32414 | 1.632892 | 1.344423 | 1.886729 | 1.424045 | 1.843253 | 1.372504 | 2.108825 | 1.869398 | 1.830025 |
| **154** | 0.488532 | 0.233775 | -0.4788 | -0.37412 | -0.0508 | -0.08709 | -0.18283 | -0.27818 | -0.04603 | 0.006228 | 0.486266 | -0.27863 | -0.69861 | 0.021025 | -0.44294 | -0.33067 |
| **155** | 0.664112 | 1.018882 | 0.568346 | 0.35113 | 0.108426 | 0.485022 | 0.503799 | 0.006 | 0.780032 | 0.720871 | 0.177613 | 0.766685 | 0.219353 | -0.03812 | 0.393062 | 0.546668 |
| **156** | -0.23176 | -0.20871 | -0.13369 | 0.400125 | -0.03548 | 0.240915 | -0.04269 | 0.345033 | 0.180427 | 0.079975 | -0.22345 | -0.01821 | -0.15348 | -0.00503 | 0.009705 | 0.055175 |
| **157** | -0.8733 | -1.15676 | -1.37174 | -1.13003 | -0.67914 | -0.86735 | -0.59911 | -1.01099 | -1.07024 | -1.10755 | -1.14273 | -1.41145 | -0.32446 | -1.40935 | -1.6974 | -1.5053 |
| **158** | 0.175949 | 0.278912 | 0.020397 | 0.700436 | -0.17485 | 0.390958 | 0.469869 | 0.302832 | 0.514611 | 0.2677 | 0.255905 | -0.06204 | 1.03149 | 0.335527 | 0.519962 | 0.704331 |
| **159** | 1.76484 | 1.366577 | 1.359441 | 1.105317 | 1.420573 | 1.310906 | 0.986899 | 1.11862 | 1.197209 | 1.452371 | 1.430965 | 1.25953 | 0.987945 | 0.423326 | 1.366762 | 1.267902 |
| **160** | 1.216075 | 1.475456 | 1.781808 | 1.066376 | 1.906658 | 1.651821 | 1.091432 | 1.025994 | 0.673428 | 1.77091 | 1.146193 | 1.088199 | 0.957867 | 1.595895 | 1.321201 | 1.252989 |
| **161** | -0.19665 | -0.42925 | -0.44983 | -0.68353 | -0.25351 | -0.5652 | -0.42058 | -0.47661 | -0.55234 | -0.67496 | -0.34979 | -0.74354 | -0.6974 | -0.96838 | -0.56758 | -0.69486 |
| **162** | -1.32194 | -1.17986 | -1.32051 | -1.62046 | -1.21641 | -1.59136 | -1.61356 | -1.58577 | -1.34219 | -1.38374 | -1.07751 | -1.36035 | -1.80317 | -1.45007 | -1.15633 | -1.49145 |
| **163** | -1.67057 | -1.76956 | -1.47365 | -0.81479 | -1.03879 | -1.66159 | -1.33395 | -1.33084 | -1.60589 | -1.54646 | -0.63667 | -0.98084 | -0.63218 | -0.97005 | -1.2576 | -1.33337 |
| **164** | 1.108478 | 1.301525 | 1.35151 | 0.993999 | 1.313491 | 1.123794 | 1.617896 | 1.006305 | 1.176945 | 1.105423 | 0.799181 | 1.05175 | 1.105843 | 1.295048 | 1.438237 | 0.985168 |
| **165** | -1.5856 | -1.03853 | -1.80548 | -1.29922 | -1.19132 | -1.33904 | -0.95828 | -1.29812 | -1.14125 | -1.01529 | -1.63458 | -1.01058 | -1.60486 | -1.07803 | -1.25021 | -1.55907 |
| **166** | -0.50155 | -0.12794 | -0.01111 | 0.176243 | 0.423869 | 0.058667 | 0.675532 | -0.10314 | -0.12742 | -0.04837 | -1.33547 | 0.128864 | -0.85956 | 0.012051 | 0.07554 | 0.031613 |
| **167** | -0.04723 | 0.068313 | 0.105452 | 0.016389 | -0.063 | 0.234416 | 0.323097 | 0.54763 | 0.601901 | 0.356411 | -0.81275 | -0.04186 | 0.071618 | 0.125219 | 0.29251 | 0.360329 |
| **168** | -0.18227 | 0.480059 | 0.307719 | 0.763818 | -0.12733 | 0.164429 | -0.20288 | 0.066566 | 0.213577 | 0.23826 | 0.664506 | 0.901915 | 0.760354 | 0.3361 | 0.813695 | 0.03842 |
| **169** | -0.37668 | -0.2916 | -0.2918 | -0.64526 | -1.10403 | -0.6644 | -1.08327 | -0.98382 | -0.8589 | -0.50707 | 0.103755 | -0.28319 | -1.18266 | -0.54109 | 0.243837 | 0.210618 |
| **170** | -0.9417 | -1.05273 | -1.23348 | -0.91877 | -0.80478 | -0.93566 | -1.12692 | -1.14619 | -0.86843 | -0.503 | -0.45632 | -0.635 | -0.60679 | -1.46921 | -1.27831 | -1.21177 |
| **171** | 0.83977 | 0.637039 | 0.575506 | -0.12695 | 0.107133 | -0.02482 | -0.00215 | -0.0478 | 0.473149 | 0.270856 | 0.097211 | 0.255995 | -0.49962 | 0.584418 | 0.538893 | 0.532286 |
| **172** | 0.157466 | 0.20148 | 0.586812 | 0.804962 | 0.558186 | 0.084992 | 0.743172 | 0.682147 | 0.938366 | 0.347511 | 0.570358 | 0.439639 | 0.853975 | 0.648884 | 0.051384 | 0.510999 |
| **173** | 1.704351 | 1.908832 | 1.332059 | 1.747207 | 1.646283 | 1.571842 | 1.266709 | 1.762734 | 1.98152 | 2.626443 | 2.612689 | 2.128278 | 1.691229 | 2.265435 | 2.229021 | 1.365156 |
| **174** | -0.51887 | -0.58314 | -0.12225 | -0.17787 | -0.28562 | -0.2073 | -0.33978 | -0.62249 | -0.5695 | -0.79974 | -1.26339 | 0.086531 | -0.55046 | -0.30756 | -0.0225 | -0.22138 |
| **175** | 1.056562 | 1.230211 | 1.31662 | 0.828258 | 0.600661 | 0.779645 | 0.436733 | 0.58856 | 0.931848 | 1.13525 | 1.061296 | 1.382465 | 0.886808 | 1.325292 | 1.415372 | 1.240097 |
| **176** | 0.612707 | 0.277351 | -0.11337 | -0.39032 | 0.054831 | -0.11931 | -0.14794 | -0.31119 | 0.419677 | 0.260118 | 0.497768 | 0.002402 | 0.103897 | -0.05865 | 0.189601 | -0.38647 |
| **177** | 0.072344 | -0.10039 | 0.133886 | -0.13857 | 0.140023 | -0.02445 | -0.06903 | 0.062483 | -0.23786 | 0.194018 | -0.29556 | -0.28149 | -0.46905 | 0.256134 | -0.3293 | 0.383823 |
| **178** | 0.613535 | 0.82598 | 0.07203 | 0.460712 | 0.207348 | 0.59048 | 0.428843 | 0.574088 | 0.474618 | 0.36276 | 0.531064 | 0.548607 | 0.514668 | 0.99193 | 0.797306 | 0.710162 |
| **179** | 0.279509 | 0.182624 | 0.152172 | -0.09448 | -0.26665 | 0.408361 | -0.14697 | 0.230267 | 0.325312 | -0.01688 | 0.114011 | 0.090774 | -0.36402 | 0.141893 | 0.017719 | 0.443272 |
| **180** | 0.290088 | -0.41333 | -0.6424 | 0.502531 | -0.05432 | 0.451261 | 0.379108 | 0.447562 | 0.073378 | -0.10027 | -0.52526 | -0.16912 | -0.00365 | -0.22462 | -0.37612 | -0.34886 |
| **181** | -0.0353 | 0.307884 | -0.08913 | 0.012927 | -0.47868 | -0.11426 | -0.70423 | 0.237661 | 0.483315 | 0.164217 | -0.26907 | 0.14344 | -0.27467 | 0.507625 | 0.515067 | 0.297622 |
| **182** | 0.69261 | 1.340007 | 0.586544 | 1.02371 | 0.904643 | 0.87685 | 0.654752 | 1.334576 | 0.795891 | 0.889665 | 0.355977 | 1.048156 | 0.792463 | 1.285462 | 0.677252 | 0.720213 |
| **183** | 0.879495 | 0.581946 | 0.665474 | 0.129129 | 0.338735 | 0.545778 | 0.155336 | 0.571615 | 0.870597 | 1.299891 | 0.285251 | 0.572853 | 0.468707 | 0.526574 | 1.070972 | 1.003096 |
| **184** | 0.964165 | 0.557909 | 0.264436 | 0.770412 | 0.38108 | 0.648923 | 0.60728 | 0.604367 | 0.518674 | 0.844919 | 0.698645 | 0.985555 | 0.5026 | 1.004154 | 0.842519 | 0.71094 |
| **185** | -0.45314 | -0.72382 | -1.06798 | -0.85372 | -0.72527 | -0.56534 | -0.7306 | -0.82622 | -0.64156 | -0.87186 | -0.68279 | -0.69326 | -0.86195 | -0.68289 | -0.85086 | -0.78119 |
| **186** | -0.01744 | 0.315428 | 0.565828 | 0.421694 | 0.884563 | 0.431879 | 0.884633 | 0.37214 | 0.154608 | 0.608563 | 0.686491 | 0.581055 | 0.09221 | 0.57461 | 0.140329 | 0.284983 |
| **187** | 1.138483 | 0.929044 | 1.410733 | 1.841936 | 1.707655 | 1.340296 | 1.514771 | 1.694796 | 1.574799 | 1.053651 | 1.316628 | 1.28103 | 1.002298 | 0.740443 | 0.878361 | 1.063758 |
| **188** | 0.509459 | 0.292557 | -0.18613 | 0.412896 | 0.03263 | 0.408349 | 0.423146 | 0.433967 | 0.835641 | -0.04326 | -0.19443 | 0.138631 | 1.052617 | 0.33426 | 0.145575 | 0.28982 |
| **189** | -0.6586 | -0.38731 | 0.007044 | -0.62867 | -0.62016 | -0.53903 | -0.61617 | -0.51279 | -0.61898 | -0.67896 | -1.24351 | -0.70319 | -1.02679 | -0.31574 | -0.55798 | -0.50652 |
| **190** | -0.72413 | -0.45747 | 0.105612 | 0.025682 | -0.07293 | -0.33764 | -0.30305 | -0.47113 | -0.25164 | -0.10954 | -1.01903 | 0.159759 | -0.48048 | 0.379102 | -0.08073 | 0.143882 |
| **191** | 0.334211 | 0.028794 | -0.34455 | 0.064274 | 0.151778 | -0.05914 | 0.368914 | 0.221794 | -0.06503 | -0.14955 | -0.33588 | 0.474706 | -0.0377 | 0.08634 | 0.05098 | -0.1738 |
| **192** | 1.657386 | 1.770846 | 1.97718 | 1.778639 | 1.891962 | 1.139744 | 0.997117 | 1.100403 | 1.441293 | 1.691675 | 1.305225 | 1.630691 | 1.044856 | 2.178011 | 1.376951 | 1.538709 |
| **193** | 0.696319 | 0.7369 | 0.874412 | 0.529183 | 0.581086 | 0.689362 | 0.773771 | 0.385136 | 0.824937 | 0.782755 | 0.43971 | 0.766638 | 0.921854 | 0.539037 | 0.463788 | 0.518374 |
| **194** | -0.02639 | 0.112531 | -0.49378 | -0.188 | -0.25744 | -0.10619 | 0.184404 | 0.367591 | -0.10518 | 0.130129 | -0.31165 | 0.021448 | 0.379545 | 0.296638 | 0.332266 | 0.12048 |
| **195** | 0.22149 | 0.977575 | 0.428772 | 0.314626 | 0.1909 | 0.273834 | 0.126134 | 0.303442 | 0.164695 | 0.532071 | 0.410447 | 0.985291 | 0.235364 | 0.38136 | 0.098636 | 0.336273 |
| **196** | -0.99926 | -0.83074 | -1.09842 | -1.19392 | -1.15103 | -1.21138 | -1.09997 | -1.35433 | -0.92459 | -1.29105 | -1.01453 | -0.50321 | -0.86459 | -1.27945 | -1.03174 | -0.64608 |
| **197** | -0.44923 | -1.08222 | -0.55926 | -0.50787 | -0.35456 | -0.95984 | -0.74673 | -0.78895 | -0.12442 | -0.65324 | -0.50728 | -1.13481 | -0.63983 | -1.76783 | -1.47921 | -0.9409 |
| **198** | 1.018354 | 0.265005 | -0.40163 | 0.140315 | -0.04587 | -0.03245 | -0.10561 | 0.580506 | 0.505338 | 0.240333 | 0.079366 | 0.048324 | -0.23497 | 0.091394 | -0.4966 | -0.02325 |
| **199** | -0.22411 | -0.75938 | -0.16008 | -0.554 | -1.02916 | -0.33658 | -0.56096 | -0.71249 | -0.14692 | -0.12329 | -0.43479 | -0.54561 | -0.96996 | -0.33138 | -0.06289 | -0.20468 |
| **200** | -0.6277 | -0.51483 | -0.94676 | -0.54515 | -0.58721 | -0.79733 | -0.75016 | -0.85954 | -0.64161 | -0.93858 | -0.37562 | -0.30549 | -1.02092 | -0.6985 | -0.84372 | -0.81446 |
| **201** | 0.570455 | 0.15232 | 0.318958 | -0.09773 | 0.580606 | 0.02209 | 0.164228 | 0.318961 | 0.475544 | -0.47477 | 0.245693 | -0.27913 | -0.21602 | -0.34307 | 0.232751 | 0.044451 |
| **202** | 0.960361 | 0.218663 | -0.00372 | 0.749466 | 0.590166 | 0.322451 | 0.875305 | 0.679563 | 0.91798 | 0.017698 | 0.146771 | 0.690677 | 0.187777 | -0.66284 | 0.346328 | 0.134182 |
| **203** | -0.68752 | -0.6481 | -0.10393 | -0.16076 | 0.027205 | 0.44739 | 0.409833 | 0.118985 | 0.40054 | -0.74344 | -0.79135 | -0.31322 | -0.24036 | -1.34915 | -0.60091 | 0.051042 |
| **204** | 0.593899 | 0.480084 | 0.348388 | 0.1982 | 0.487705 | 0.575137 | 0.551491 | 0.400029 | 0.118587 | 0.555897 | 0.402004 | 0.47705 | 0.694617 | 0.680348 | 0.231535 | 0.461645 |
| **205** | -0.15131 | 0.682212 | 0.608762 | 0.27123 | 0.051899 | 0.470197 | 0.168405 | 0.633832 | 0.496918 | 0.439609 | 0.355533 | 0.647332 | -0.03453 | -0.25331 | 0.546055 | 0.919665 |
| **206** | -0.74901 | -1.06253 | -0.81153 | -1.11549 | -1.24572 | -0.88465 | -1.17446 | -1.1456 | -1.16121 | -0.73255 | -0.66789 | -0.55151 | -1.19873 | -0.74152 | -0.46923 | -0.34948 |
| **207** | 0.363662 | 0.79363 | 0.976245 | 0.896822 | 0.988261 | 1.024487 | 0.523037 | 0.361584 | 0.419834 | 0.966388 | 1.30105 | 1.157472 | 0.994521 | 0.843923 | 1.424116 | 0.359872 |
| **208** | -0.37028 | -0.29197 | 0.354083 | 0.304758 | -0.00127 | -0.03968 | 0.093884 | -0.16086 | 0.014134 | 0.188597 | -0.16368 | 0.239729 | -0.12325 | 0.192183 | 0.343374 | -0.08302 |
| **209** | -0.08463 | 0.162616 | 0.41634 | -0.29465 | -0.13364 | 0.082602 | 0.203573 | 0.078322 | -0.12325 | -0.22826 | 0.355291 | -0.04434 | 0.63677 | -0.13236 | -0.24026 | 0.121779 |
| **210** | -1.0536 | -1.29426 | -1.56277 | -0.87738 | -1.00908 | -0.81763 | -0.92352 | -1.14656 | -0.70839 | -1.47577 | -1.21269 | -1.20673 | -1.38316 | -1.3723 | -1.49453 | -1.10047 |
| **211** | 1.037628 | 1.450111 | 1.708453 | 1.374513 | 1.258591 | 1.547882 | 1.345976 | 1.243397 | 1.565045 | 0.949531 | 1.632306 | 1.292967 | 1.19628 | 1.925407 | 1.828525 | 2.33871 |
| **212** | 2.198333 | 1.588498 | 1.597593 | 1.828329 | 1.66363 | 2.021095 | 0.998863 | 1.576735 | 1.692021 | 1.549608 | 1.092029 | 1.149667 | 0.31254 | 1.40806 | 1.898075 | 1.536022 |
| **213** | 1.418481 | 0.641941 | 1.228462 | 0.83998 | 0.651034 | 1.114989 | 1.176908 | 1.967242 | 1.524939 | 0.959256 | 0.846018 | 0.81822 | 1.952921 | 1.017221 | 1.393565 | 1.560121 |
| **214** | -0.96868 | -0.21353 | 0.183577 | 0.092375 | -0.16851 | -0.27719 | -0.16959 | -0.42863 | -0.90696 | -0.47988 | -0.76808 | -0.00085 | -0.32852 | 0.198751 | -0.18042 | -0.76415 |
| **215** | -1.35349 | -1.20854 | -1.70645 | -1.25957 | -1.56107 | -1.93931 | -1.80154 | -1.56061 | -1.55246 | -1.33069 | -1.21335 | -1.52163 | -1.34828 | -1.08979 | -1.22752 | -1.54263 |
| **216** | 0.532943 | 0.664649 | -0.1628 | 0.154606 | -0.10231 | -0.2062 | 0.183173 | 0.396698 | -0.05421 | 0.074185 | 0.74123 | 0.446534 | -0.1108 | -0.06955 | 0.378483 | -0.10058 |
| **217** | 0.657338 | 0.304492 | 0.365626 | 0.37125 | 0.738239 | 0.238087 | 0.740096 | 0.099476 | 0.004521 | 0.452775 | 0.831166 | -0.05855 | 0.492056 | 0.233797 | 0.114012 | 0.352948 |
| **218** | 0.244175 | 0.684504 | 0.611395 | 0.300816 | 0.135585 | 0.230223 | 0.035122 | 0.679034 | 0.082973 | 0.225628 | 0.728942 | 0.458719 | 0.466556 | 0.611039 | 0.874006 | 0.634645 |
| **219** | 0.071087 | -0.16208 | 0.364703 | 0.321489 | 0.121802 | 0.341931 | 0.331229 | -0.01719 | -0.14552 | -0.01589 | -0.26826 | -0.25089 | 0.051901 | 0.058422 | 0.127995 | 0.16468 |
| **220** | 1.736879 | 1.574663 | 1.783244 | 1.738665 | 1.695618 | 1.949594 | 2.103323 | 2.134116 | 1.867127 | 2.051754 | 2.186663 | 1.60178 | 2.404654 | 1.858967 | 1.968836 | 1.670033 |
| **221** | -0.16533 | -0.65056 | -0.4477 | -0.30666 | 0.089277 | -0.3485 | -0.11356 | -0.52992 | -0.20403 | -0.259 | -0.54445 | -0.48922 | -0.03715 | -0.16022 | -0.31038 | -0.65081 |
| **222** | 0.015118 | -0.37495 | -0.42047 | -0.7243 | -0.64169 | -0.39885 | -1.07814 | -0.48645 | 0.198021 | -0.214 | 0.069856 | -0.69434 | -0.2004 | 0.279414 | -0.0105 | -0.403 |
| **223** | 0.610576 | 0.502349 | 0.79088 | 1.077866 | 0.827062 | 0.805111 | 0.681727 | -0.01503 | 0.18225 | 1.170431 | 1.175744 | 0.986687 | 0.731107 | 1.453411 | 1.20059 | 0.594386 |
| **224** | -1.61164 | -1.26969 | -1.29124 | -1.42779 | -1.28776 | -1.13937 | -1.28458 | -1.27486 | -1.44541 | -1.34683 | -0.60114 | -1.09224 | -1.09532 | -1.53516 | -1.16371 | -1.34267 |
| **225** | -0.08866 | -0.38055 | 0.449926 | 0.792218 | 0.239529 | 0.066193 | 0.330069 | 0.272192 | -0.18931 | 0.100004 | -0.35055 | 0.291559 | -0.09177 | 0.241471 | 0.531102 | 0.641518 |
| **226** | -0.11532 | -1.10537 | -0.65899 | -0.42017 | -0.81 | -0.28745 | -0.07267 | 0.383931 | 0.044245 | -0.56396 | -0.87338 | -0.61235 | -0.19599 | -0.28738 | -0.51105 | -0.15063 |
| **227** | -0.09999 | 0.0797 | -0.92723 | -0.4881 | -1.22869 | -0.69899 | -1.10196 | -0.51695 | -0.4831 | -0.22669 | 0.041541 | -0.17058 | -0.91589 | 0.122206 | 0.447853 | -0.55061 |
| **228** | 1.22649 | 1.642507 | 2.004006 | 1.538164 | 1.563775 | 1.558029 | 1.360828 | 1.651921 | 1.927754 | 1.205087 | 1.250758 | 1.6561 | 1.410174 | 1.343938 | 1.773297 | 1.793869 |
| **229** | -1.60752 | -1.02385 | -0.19351 | -0.21186 | -0.48714 | -0.79943 | -0.66498 | -0.99674 | -1.44611 | -0.55974 | -1.3029 | -0.71491 | -0.4579 | 0.060185 | -0.80698 | -0.44192 |
| **230** | -1.79596 | -1.17054 | -1.85083 | -2.35064 | -2.30927 | -1.97094 | -2.13804 | -1.7173 | -1.53236 | -1.88533 | -1.85829 | -1.94723 | -2.11013 | -1.76039 | -1.66802 | -0.98703 |
| **231** | 0.027888 | -0.29799 | 0.143467 | 0.073777 | 0.108712 | 0.004037 | 0.144917 | 0.171896 | -0.14342 | -0.55629 | -0.01477 | 0.102396 | -0.21379 | -0.27284 | 0.404979 | 0.005142 |
| **232** | 0.45385 | 0.775011 | 0.172986 | -0.09773 | 0.275702 | 0.310676 | -0.13233 | 0.329148 | 0.146048 | 0.214321 | 0.191667 | 0.363414 | 0.247821 | -0.45761 | -0.34655 | 0.009192 |
| **233** | -0.30406 | -0.01315 | 0.150078 | -0.32478 | 0.243151 | -0.3096 | 0.160686 | -0.38088 | 0.07859 | -0.29376 | -0.04661 | -0.38796 | 0.028693 | -0.28322 | -0.06567 | -0.04136 |
| **234** | 0.642934 | 0.289357 | 0.328311 | 0.573241 | 0.166815 | 0.275611 | 0.11465 | 0.041919 | 0.320558 | 0.114386 | -0.09855 | 0.179768 | 0.045857 | 0.08484 | -0.00834 | 0.203827 |
| **235** | -0.1543 | 0.210439 | 0.18325 | -0.24305 | 0.392351 | 0.146182 | 0.830526 | 0.508536 | 0.333736 | 0.048986 | -0.5806 | 0.031167 | 0.397793 | -0.21169 | -0.08789 | 0.267331 |
| **236** | -0.06302 | 0.205925 | 0.201266 | -0.15915 | 0.033618 | 0.039401 | 0.600623 | 0.281469 | 0.200932 | -0.21498 | 0.11977 | -0.21377 | -0.17068 | -0.11764 | 0.097981 | 0.080856 |
| **237** | 1.783967 | 1.432041 | 0.239651 | 1.275408 | 1.075096 | 0.919525 | 0.759408 | 1.488833 | 1.073684 | 1.178205 | 1.54777 | 1.261429 | 1.388631 | 0.955525 | 0.901213 | 0.708872 |
| **238** | -0.41219 | 0.301122 | 0.971556 | 0.217874 | 0.421464 | -0.11148 | -0.46048 | -0.39059 | -0.44324 | 0.21933 | 0.649647 | 0.582275 | -0.1133 | 0.649405 | 0.443797 | 0.515841 |
| **239** | 0.647156 | 0.994237 | 0.943713 | 0.803798 | 0.583863 | 0.74384 | 0.171895 | 0.06712 | 0.915591 | 0.683689 | 0.736592 | 0.892163 | 0.495717 | 0.223489 | 0.862369 | 0.760501 |
| **240** | -0.95101 | -1.02139 | -0.65719 | -0.4227 | -0.48776 | -0.42474 | 0.102855 | 0.135277 | -0.59095 | -0.62898 | -0.22666 | -0.56578 | 0.283015 | -0.60088 | -0.50571 | -0.72069 |
| **241** | -0.012 | -0.31203 | -0.37966 | -0.22471 | -0.47056 | 0.324829 | -0.08196 | -0.36693 | -0.4223 | -0.15727 | -0.43548 | -0.01844 | -0.02247 | -0.31111 | -0.82868 | -0.54369 |
| **242** | 0.337095 | 0.57747 | 0.076804 | 0.300749 | 0.082532 | -0.24978 | -0.03003 | -0.23034 | 0.046103 | 0.48111 | 0.851128 | 0.541557 | -0.40515 | 1.048848 | 0.830797 | 0.237409 |
| **243** | 0.594956 | 0.452471 | 0.456485 | 0.229687 | 0.396016 | 0.524592 | 0.631865 | 0.726407 | 0.099479 | 0.738981 | 0.126994 | 0.423045 | 0.429964 | 0.398847 | 0.390701 | 0.763288 |
| **244** | -1.43001 | -1.00983 | -1.24804 | -1.59029 | -1.71663 | -1.54219 | -1.24658 | -1.61018 | -1.40704 | -1.56368 | -1.4408 | -1.15778 | -1.32034 | -1.41941 | -0.97333 | -1.34102 |
| **245** | -0.57037 | -0.34575 | 0.326058 | -0.44475 | -0.28226 | 0.296122 | 0.310376 | -0.10119 | -0.49745 | -0.13824 | 0.18271 | -0.24538 | -0.3325 | -0.19906 | -0.06617 | -0.19219 |
| **246** | -0.2294 | -0.73847 | -0.74837 | -0.66777 | -1.22143 | -0.41812 | -0.83646 | -0.92568 | -0.76798 | -0.30977 | -1.1906 | -0.84093 | -1.27949 | 0.138856 | -0.34511 | -0.59802 |
| **247** | 0.295807 | 0.287979 | 0.167441 | 0.556936 | 0.699963 | 0.745666 | 0.177054 | 0.244767 | 0.118054 | 0.611303 | 0.901138 | 0.505938 | 0.156619 | 0.249732 | 0.235172 | 0.05113 |
| **248** | 0.179278 | 1.090247 | 0.91855 | 0.191154 | -0.07124 | 0.261465 | 0.528432 | 0.868362 | 0.752907 | 0.613981 | 0.844546 | 0.459685 | 0.663824 | 0.791113 | 1.320907 | 1.176057 |
| **249** | 1.087976 | 1.381498 | 1.311241 | 1.679608 | 0.798104 | 0.968167 | 0.727031 | 0.402929 | 0.818525 | 0.577971 | 1.114676 | 0.96797 | -0.15617 | 0.533897 | 1.61347 | 0.782767 |
| **250** | 0.795207 | 0.441751 | 0.603699 | 0.160127 | 0.729278 | 0.510158 | 0.121905 | -0.09927 | 0.301488 | 0.62983 | 0.500831 | 0.193149 | -0.33896 | 0.535966 | -0.02505 | 0.186062 |
| **251** | -0.13694 | -0.30456 | 0.118803 | -0.07311 | 0.124572 | -0.16966 | 0.085687 | 0.288827 | 0.022557 | -0.08364 | -0.69365 | 0.0827 | 0.33076 | -0.06732 | -0.47575 | 0.187395 |
| **252** | 0.719857 | 0.323731 | 0.316195 | 0.839776 | 0.523876 | 0.570627 | 0.313404 | 0.284899 | 0.438835 | 0.536884 | 1.389439 | 0.569622 | 0.607534 | 0.231567 | 0.976308 | 0.623899 |
| **253** | -0.01196 | 0.00151 | 0.470603 | 0.175538 | 0.09947 | 0.180014 | 0.235642 | -0.23768 | -0.23331 | 0.139196 | 0.396487 | 0.290208 | 0.695279 | 0.162919 | -0.12893 | 0.115865 |
| **254** | -0.39724 | -0.11854 | -0.08455 | -0.30937 | -0.77182 | -0.46212 | -0.67553 | -0.03482 | -0.35067 | 0.182154 | 0.708162 | -0.12915 | 0.181413 | -0.17547 | 0.288231 | 0.240496 |
| **255** | -0.11228 | -0.05751 | -0.3008 | -0.55624 | -0.25911 | -0.16824 | -0.57341 | -0.4216 | -0.65617 | -0.10232 | 0.215845 | -0.72454 | 0.0878 | -0.51029 | -0.45819 | -0.94998 |
| **256** | 0.624949 | 0.056796 | 0.476859 | 0.360746 | 0.554489 | 0.516451 | 0.943189 | 0.53516 | 0.570841 | 0.190869 | 0.370879 | 0.397364 | 0.442364 | 0.197702 | 0.124643 | 0.608633 |
| **257** | -0.80337 | 0.175433 | -0.23996 | -0.90612 | -0.53824 | -0.24096 | -0.191 | -0.4327 | -0.67395 | -0.48925 | -0.5821 | -0.6987 | -0.5004 | -0.90312 | -0.3272 | -0.77657 |
| **258** | 0.04452 | 0.753819 | 0.471137 | -0.11477 | 0.304024 | 0.079966 | 0.19868 | 0.046491 | 0.07931 | 0.194627 | -0.10421 | 0.344279 | -0.4429 | 0.635107 | 0.23187 | 0.329963 |
| **259** | -0.31577 | 0.019651 | -0.25205 | -0.23352 | -0.35042 | -0.30388 | -0.51765 | -0.35784 | -0.44362 | 0.184067 | -0.15563 | -0.12984 | -0.46733 | 0.022907 | -0.27248 | -0.30265 |
| **260** | -0.77487 | -0.93394 | -1.13319 | -1.82497 | -1.54927 | -1.45759 | -1.80599 | -1.88529 | -1.2521 | -0.88023 | -1.01614 | -1.09735 | -1.72006 | -1.60554 | -1.09513 | -1.09631 |
| **261** | -0.55555 | 0.20236 | -0.13114 | 0.129172 | -0.09302 | 0.000436 | -0.23259 | 0.108629 | -0.44597 | -0.38362 | -0.12806 | -0.02063 | -0.30247 | 0.207649 | 0.208798 | -0.27249 |
| **262** | -0.53061 | 0.274217 | 0.184315 | -0.26142 | 0.426114 | 0.525636 | 0.628893 | -0.06932 | 0.223028 | -0.16531 | -0.73664 | 0.465196 | -0.54188 | -0.76371 | -0.34553 | -0.08208 |
| **263** | 0.500646 | 0.668299 | 0.498074 | 0.595213 | 1.275459 | 1.00668 | 0.726238 | 0.794653 | 1.006153 | 1.262777 | 1.609527 | 0.967742 | 0.986543 | 0.978973 | 1.071182 | 0.395978 |
| **264** | -0.71191 | -0.6337 | -0.11361 | -0.35487 | -0.13184 | -0.38383 | -0.42428 | -0.24397 | -0.64587 | -0.34584 | -0.48288 | -0.41726 | 0.01904 | -0.65897 | -0.65648 | -0.82363 |
| **265** | 0.625534 | 0.44941 | 0.506217 | 1.039467 | 0.863973 | 0.930335 | 0.552899 | 0.723786 | 1.115074 | 0.879093 | 0.72701 | 0.789207 | 0.652346 | 0.746815 | 1.23546 | 1.12904 |
| **266** | 0.54873 | 0.038976 | 0.017216 | 0.415571 | 0.464784 | 0.51133 | 0.342681 | 0.43593 | 0.193516 | 0.837051 | 0.57083 | 0.128671 | 0.625123 | 0.028914 | -0.04295 | 0.045758 |
| **267** | -0.34489 | -0.4239 | -0.87025 | -0.39857 | -0.27594 | -0.42166 | -0.00786 | -0.02299 | 0.311687 | -0.1601 | -0.17058 | -1.01318 | 0.558345 | -0.04394 | -0.47106 | -0.57402 |
| **268** | -1.11526 | -1.35773 | -1.06042 | -1.01464 | -1.42094 | -1.1768 | -1.81749 | -1.42274 | -1.3246 | -1.31561 | -1.10534 | -1.27007 | -1.57379 | -0.6947 | -0.50857 | -0.52081 |
| **269** | 1.303985 | 0.943663 | 1.032758 | 0.875888 | 0.927848 | 0.2039 | 0.374111 | 0.789491 | 0.881275 | 0.863139 | 1.575756 | 0.844138 | 1.040889 | 0.39738 | 0.463877 | 0.551919 |
| **270** | 0.812628 | 1.003648 | 0.882846 | 0.74974 | 0.704186 | 0.850893 | 0.527268 | 0.748406 | 0.501347 | 0.920478 | 0.637792 | 1.101355 | 0.667506 | 1.14735 | 1.307608 | 0.742504 |
| **271** | -1.89737 | -1.91984 | -1.55715 | -2.22999 | -1.3883 | -1.85566 | -2.0373 | -1.78961 | -2.10753 | -1.81553 | -2.14756 | -2.12055 | -1.82445 | -1.82641 | -2.09022 | -1.8546 |
| **272** | 1.222569 | 0.979424 | 1.564308 | 1.300218 | 1.821597 | 1.595197 | 1.937413 | 1.458261 | 1.640578 | 1.558546 | 0.857009 | 1.871505 | 1.111142 | 1.09027 | 1.316502 | 1.405273 |
| **273** | -0.57801 | 0.0489 | 0.074172 | -0.51317 | -0.24694 | -0.86961 | -0.16323 | -0.50063 | -0.83407 | -0.67367 | -0.54165 | -0.73913 | -0.14165 | -0.48812 | -0.42782 | -0.50398 |
| **274** | 0.588661 | -0.08423 | 0.460218 | 0.647804 | 0.551751 | 0.567201 | 0.629592 | 0.568503 | 0.114722 | 0.576731 | 0.529259 | 0.4743 | 0.21566 | 1.046933 | 0.724167 | 0.450194 |
| **275** | 0.657445 | 0.629432 | 0.809948 | 0.821027 | 0.143701 | 0.312182 | 0.328902 | 0.300645 | 0.420848 | -0.06079 | 0.550088 | 0.13006 | 0.333531 | -0.0245 | 0.842298 | 0.630428 |
| **276** | 0.150522 | 0.356343 | 0.472719 | 0.43589 | 0.361026 | 0.631556 | 0.879988 | 0.829949 | 0.286789 | 0.344972 | 0.537092 | 0.747533 | 0.469808 | 0.161218 | 0.501231 | 0.102154 |
| **277** | -0.51138 | -0.67645 | -0.15711 | 0.781198 | 0.124015 | 0.12662 | 0.606334 | 0.263782 | 0.323281 | -0.09207 | -0.81574 | 0.242358 | 0.210908 | 0.010215 | 0.20633 | 0.247014 |
| **278** | 0.26789 | 0.806829 | 0.866378 | 1.560386 | 1.000048 | 1.342829 | 0.849925 | 1.05856 | 0.752603 | 1.126878 | 0.267235 | 1.460408 | 0.805736 | 1.192267 | 1.332666 | 1.031791 |
| **279** | -0.54316 | -0.16543 | 0.529167 | -0.39697 | -0.28738 | -0.42137 | -0.62017 | -0.75105 | -0.54482 | -0.34514 | -0.06806 | -0.60871 | 0.152169 | -0.62004 | -0.63637 | 0.067464 |
| **280** | 0.209728 | 0.052092 | 0.047456 | -0.00267 | 0.310139 | 0.325201 | 0.431752 | 0.337721 | -0.15271 | -0.28361 | -0.0572 | -0.1502 | 0.035501 | -0.31884 | -0.29872 | 0.141654 |
| **281** | -0.39927 | -0.17477 | 0.121967 | 0.326128 | 0.291231 | 0.17376 | 0.161293 | 0.082466 | 0.0827 | -0.05366 | -0.32744 | -0.42822 | -0.01346 | 0.585024 | 0.110488 | 0.343314 |
| **282** | 0.646037 | 0.67464 | 1.099432 | 1.05619 | 1.049786 | 0.785136 | 0.858501 | 1.409937 | 1.043897 | 1.328718 | 1.306007 | 0.928035 | 1.877937 | 1.493623 | 1.514532 | 0.931087 |
| **283** | -0.21152 | -0.09826 | 0.33654 | 0.326823 | 0.322507 | 0.461369 | 0.478622 | 0.342563 | -0.14088 | 0.893658 | 0.287661 | 0.775525 | 0.331438 | -0.12186 | -0.03622 | -0.26671 |
| **284** | -1.36992 | -1.8713 | -1.89319 | -2.06094 | -1.52804 | -1.52646 | -1.48727 | -1.63325 | -1.31513 | -1.6745 | -1.91358 | -1.76692 | -1.37124 | -1.23905 | -1.68058 | -1.4251 |
| **285** | -0.30175 | -1.13061 | -0.168 | 0.001542 | -0.10757 | -0.70234 | -0.41633 | -0.39941 | -0.46638 | -0.57607 | -0.64685 | -0.47783 | 0.39601 | -0.76591 | -1.26647 | -0.6183 |
| **286** | 0.500832 | 0.73446 | 0.458413 | 0.533926 | 0.259753 | 0.540812 | 0.596168 | 0.312431 | 0.359376 | 0.700511 | 0.873946 | 0.491633 | 0.309116 | 0.624658 | 0.70726 | 0.587526 |
| **287** | -0.62588 | -0.95721 | -1.47043 | -1.25346 | -0.88627 | -1.57326 | -1.2861 | -1.25985 | -0.81656 | -1.03991 | -0.99882 | -1.01112 | -0.89483 | -1.40448 | -1.06444 | -1.1471 |
| **288** | 0.742324 | 1.370986 | 1.20921 | 1.091563 | 1.323355 | 1.016199 | 1.437383 | 1.207669 | 0.744195 | 1.14618 | 1.411873 | 1.2535 | 0.773789 | 0.713784 | 0.9568 | 0.657783 |
| **289** | -0.29932 | -0.31809 | -0.57785 | -0.34575 | -0.30216 | -0.262 | -0.19008 | -0.00967 | 0.093296 | -0.00105 | 0.438874 | -0.10045 | 0.002506 | 0.166565 | 0.117026 | -0.2962 |
| **290** | 0.067377 | -0.12222 | 0.195448 | 0.24296 | 0.659534 | -0.03589 | 0.710998 | 0.400774 | 0.323374 | -0.04237 | 0.259985 | -0.02851 | 0.620184 | 0.719518 | 0.575064 | 0.042286 |
| **291** | 1.408579 | 1.598146 | 1.362403 | 1.682436 | 1.799402 | 1.604319 | 2.101227 | 1.460632 | 1.484122 | 1.680313 | 1.941923 | 1.710116 | 1.288216 | 1.720316 | 1.994908 | 0.66167 |
| **292** | -1.19708 | -0.90227 | -0.67149 | -1.2285 | -0.70634 | -1.0045 | -1.03335 | -1.04248 | -0.41839 | -1.44881 | -0.80948 | -1.23271 | -0.07231 | -2.16727 | -1.48412 | -1.25784 |
| **293** | 0.502796 | 0.599033 | 0.730349 | 0.098435 | 0.411214 | 0.643286 | 0.60135 | 0.2661 | 0.667106 | 0.595573 | 0.386498 | 0.528258 | 0.435939 | 0.551845 | 0.130753 | 0.49979 |
| **294** | 0.269591 | -0.32142 | -0.13953 | 0.245649 | -0.5245 | -0.01702 | -0.41696 | 0.095379 | -0.10932 | -0.36272 | 0.254631 | -0.32015 | 0.457627 | -0.31672 | -0.49044 | 0.007831 |
| **295** | 0.175423 | 0.181383 | -0.0397 | -0.03211 | -0.4531 | 0.048946 | -0.67416 | -0.76846 | -0.45776 | -0.3572 | -0.11874 | 0.288719 | -0.50398 | -0.15335 | 0.035754 | -0.02956 |
| **296** | -0.37903 | -1.13433 | -0.84122 | 0.037479 | -0.77561 | -0.49404 | -0.53958 | -0.50694 | -0.39761 | -1.14074 | -0.42148 | -1.06834 | -0.66881 | -1.15388 | -1.15632 | -0.4233 |
| **297** | -0.47919 | 0.13413 | 0.531792 | 0.011805 | 0.024889 | 0.581175 | 0.530147 | 0.05508 | 0.653918 | 0.735233 | -0.2118 | -0.09097 | 0.565976 | 0.233047 | 0.386766 | 0.312 |
| **298** | -0.20105 | -0.51453 | -0.74667 | -0.68475 | -0.25232 | -0.66903 | -0.27931 | -0.21389 | -0.1443 | -0.74117 | -0.47786 | -0.70186 | 0.1901 | -0.94794 | -1.15009 | -1.12596 |
| **299** | 1.517928 | 1.398169 | 0.415592 | 1.152358 | 0.991321 | 1.729962 | 1.23734 | 1.35176 | 1.023294 | 1.652689 | 1.532891 | 1.222307 | 0.695254 | 1.479179 | 1.418473 | 1.200852 |
| **300** | 0.6857 | 0.476747 | -0.28328 | 0.156772 | 0.079034 | 0.055101 | -0.11079 | 0.599861 | 0.346708 | -0.0739 | 0.103825 | 0.224031 | 0.164046 | 0.211607 | -0.18433 | 0.064679 |
| **301** | 0.388217 | 0.444983 | 0.261945 | 0.523491 | 0.375974 | 0.489458 | 0.7629 | 0.674063 | 0.855477 | 0.058467 | 0.141849 | 0.275592 | 0.654555 | 0.472958 | 0.543746 | 0.524331 |
| **302** | 0.414743 | -0.13305 | -0.04089 | -0.42125 | 0.275031 | 0.397827 | -0.41188 | 0.005895 | 0.33619 | 0.164181 | 0.254936 | 0.011149 | -0.18216 | -0.08988 | 0.254103 | -0.10992 |
| **303** | -0.07617 | -0.19279 | -0.09341 | -0.79185 | -0.17364 | -0.28115 | -0.45331 | -0.74421 | -0.3537 | 0.333594 | -0.08662 | -0.78075 | -0.40414 | 0.321116 | -0.20269 | -0.38958 |
| **304** | -1.84944 | -1.71208 | -2.07737 | -2.35836 | -2.24532 | -2.07534 | -2.09672 | -2.11059 | -1.69156 | -1.5326 | -1.60572 | -2.74229 | -1.4516 | -1.51048 | -1.7937 | -1.83849 |
| **305** | 1.105454 | 0.944077 | 1.070334 | 0.439362 | 0.643543 | 0.929388 | 0.602568 | 0.809358 | 1.08499 | 0.498647 | 0.763606 | 0.637022 | 0.367101 | 0.615529 | 0.982467 | 0.773207 |
| **306** | -0.13797 | -0.55048 | 0.052494 | 0.784091 | 0.629883 | -0.22807 | -0.08055 | -0.05858 | -0.40501 | -0.27703 | -0.019 | 0.165151 | 0.439353 | 0.303962 | -0.23441 | 0.114741 |
| **307** | 0.230594 | 0.440936 | 0.634112 | -0.14282 | 0.240538 | 0.527712 | 0.383563 | 0.241516 | 0.363841 | 0.491711 | -0.1926 | 0.556363 | 0.097023 | 0.431185 | 0.067696 | 0.979332 |
| **308** | 0.426324 | -0.57982 | -0.21471 | 0.043896 | -0.69428 | -0.65865 | -1.08445 | -0.09635 | -0.14611 | -0.42942 | 0.075918 | -0.36595 | -0.68293 | -0.60925 | -0.44969 | 0.168484 |
| **309** | 0.586618 | 0.651771 | 0.235231 | 0.789024 | 0.347411 | 0.207601 | 0.275 | 0.613372 | 0.340483 | 0.709373 | 0.651315 | 0.819499 | 0.487262 | 0.71892 | 0.570261 | 0.320239 |
| **310** | -0.36194 | -0.30149 | 0.099192 | -0.14083 | -0.0693 | 0.039248 | -0.27256 | 0.319747 | -0.16374 | 0.019922 | -0.08763 | -0.15151 | -0.21701 | -0.28708 | -0.19705 | -0.35743 |
| **311** | 0.874904 | 0.753787 | 1.12926 | 1.550058 | 1.329526 | 0.974391 | 1.249503 | 0.725495 | 0.868551 | 0.463532 | 0.485907 | 0.806781 | 1.086802 | 0.506596 | 0.589587 | 0.530777 |
| **312** | 0.077805 | 0.032064 | -0.08037 | -0.37642 | -0.46979 | -0.28101 | -0.41352 | -0.35216 | 0.15286 | 0.329639 | 0.062825 | -0.56467 | -0.12064 | 0.222607 | -0.30201 | 0.044379 |
| **313** | -0.60386 | 0.1705 | -0.2029 | 0.155195 | 0.02688 | -0.02802 | -0.01201 | -0.07083 | -0.30335 | 0.172193 | 0.059305 | 0.64763 | 0.651896 | 0.397212 | -0.37267 | -0.32911 |
| **314** | 0.023089 | 0.004502 | -0.08366 | 0.06726 | 0.338431 | 0.417035 | 0.212282 | 0.425462 | 0.154596 | 0.006561 | -0.14352 | 0.175171 | 0.004843 | 0.384787 | -0.24485 | 0.14533 |
| **315** | 0.080736 | 0.339547 | -0.60145 | 0.141001 | -0.45825 | 0.162989 | -0.06543 | 0.142835 | 0.264862 | -0.13925 | 0.420938 | -0.23084 | -0.40538 | -0.04422 | 0.529988 | 0.203353 |
| **316** | 1.984893 | 1.844118 | 1.26521 | 0.929685 | 0.719103 | 1.022916 | 0.460642 | 1.375279 | 1.026482 | 1.186011 | 1.422292 | 0.782095 | 0.988281 | 1.839583 | 0.942256 | 1.649258 |
| **317** | 0.020644 | 0.294413 | 0.256512 | 0.648887 | 0.373195 | 0.435101 | 0.542138 | 0.431887 | 0.228041 | 0.368054 | 0.381521 | 0.380604 | 0.370452 | 0.628003 | 0.550374 | 0.663392 |
| **318** | -0.32316 | -1.30328 | -0.70119 | -0.94486 | -1.27279 | -0.78175 | -1.72954 | -0.73469 | -0.632 | -1.19677 | -0.85578 | -0.98671 | -0.79863 | -1.40607 | -0.73197 | -0.46959 |
| **319** | 0.36211 | 0.264456 | -0.5449 | -0.44694 | -0.8417 | -0.78077 | -0.43606 | -0.11044 | -0.16491 | -0.41796 | -0.37561 | -0.40104 | -0.82513 | -0.29269 | -0.1288 | -0.06528 |
| **320** | 0.07944 | 0.063517 | 0.580507 | 0.365379 | 0.143319 | 0.171811 | 0.639143 | 0.445089 | 0.305914 | 0.52301 | 0.685349 | -0.01737 | 0.631007 | 0.402585 | 0.472208 | 0.784463 |
| **321** | -0.92186 | -0.76977 | -0.50831 | -0.73369 | -0.95194 | -0.21571 | -0.53201 | -0.40799 | -0.47923 | -0.98561 | -1.2318 | -0.98533 | -1.21287 | -0.52592 | -0.46946 | -0.39647 |
| **322** | -0.11456 | 0.398842 | -0.58572 | 0.027857 | 0.117193 | -0.45341 | -0.6184 | -0.65397 | -0.49366 | -0.63542 | -0.82092 | -0.72325 | -0.49534 | -0.56859 | -0.37919 | -0.8173 |
| **323** | 1.086038 | 1.207703 | 0.711832 | 0.915385 | 0.906595 | 0.694038 | 0.834771 | 0.812217 | 1.220201 | 0.970631 | 1.173628 | 0.901033 | 0.835185 | 0.857493 | 0.739099 | 0.791517 |
| **324** | 1.204579 | 1.186662 | 1.316983 | 0.579697 | 0.86489 | 1.03709 | 1.562992 | 1.050599 | 0.980742 | 1.301779 | 1.27502 | 0.559269 | 1.626505 | 0.948976 | 0.674053 | 1.046167 |
| **325** | -1.05038 | -0.02918 | -0.36485 | -0.28404 | -0.36196 | -0.49988 | -0.49304 | -0.15722 | -0.5925 | -0.14167 | -0.57446 | 0.03971 | -1.26434 | -0.39798 | -0.10678 | -0.62281 |
| **326** | 1.163251 | 0.173175 | 0.221361 | 0.625543 | 0.335406 | 0.709204 | 0.802303 | 1.149974 | 0.661701 | 0.409774 | 0.299156 | 0.479924 | 0.643121 | 0.071234 | 0.354776 | 0.097001 |
| **327** | 2.181104 | 1.890792 | 1.900581 | 1.558826 | 1.542915 | 1.25774 | 1.174395 | 1.390253 | 1.701287 | 2.443744 | 2.461128 | 2.1241 | 1.90131 | 2.410268 | 2.309472 | 1.698356 |
| **328** | 0.441145 | 0.641124 | 0.561588 | 0.359228 | 0.137147 | 0.542674 | 0.788699 | 0.357107 | 0.539616 | 0.337789 | 0.542463 | 0.482275 | 0.812226 | 0.62487 | 0.894768 | 0.521939 |
| **329** | 1.114266 | 1.248721 | 1.342888 | 1.219426 | 1.855205 | 1.013699 | 1.733216 | 1.375973 | 1.025124 | 1.605888 | 0.760238 | 1.710978 | 1.328532 | 1.517161 | 0.711317 | 0.969057 |
| **330** | -0.69857 | -0.60679 | -0.53066 | -0.2937 | -0.47149 | -0.3447 | -0.19801 | -0.03931 | -0.24193 | -0.83024 | -1.08452 | -0.17244 | -0.71431 | -0.93609 | -0.61782 | -0.86724 |
| **331** | -0.46766 | -0.44732 | -0.4065 | -0.28113 | -0.81042 | -0.52255 | -0.65013 | -0.38528 | -0.33505 | -0.48296 | -0.42398 | -0.32544 | -0.67831 | -0.20093 | -0.39373 | -0.11897 |
| **332** | 0.08665 | 0.194667 | 0.57878 | 0.220564 | 0.326914 | 0.566193 | 0.768997 | 0.574049 | 0.138996 | 0.604723 | -0.10973 | -0.44447 | 0.006927 | -0.27173 | -0.09932 | 0.527157 |
| **333** | -0.58666 | -0.22677 | 0.349621 | 0.073475 | -0.00305 | 0.409507 | -0.486 | -0.5939 | -0.21115 | -0.25772 | -0.28346 | 0.141208 | -1.10353 | 0.267443 | 0.595787 | 0.571288 |
| **334** | -0.77662 | -1.07149 | -1.29201 | -1.6728 | -1.18902 | -0.86167 | -0.94071 | -1.03592 | -0.92962 | -0.87445 | -1.03879 | -1.45046 | -0.66501 | -0.77245 | -0.8688 | -1.14466 |
| **335** | -0.00938 | -0.44481 | -1.00721 | -0.14392 | -0.37713 | -0.27783 | 0.017034 | -0.31881 | -0.69464 | -0.31016 | -0.48126 | -0.63011 | 0.026031 | 0.296072 | 0.036034 | -0.72799 |
| **336** | -0.32191 | -0.54005 | -0.44931 | -0.28885 | -0.60872 | -0.87385 | -0.78367 | -0.47639 | -0.7129 | -0.73874 | -0.14396 | -0.39313 | -0.36003 | -0.20335 | -0.43876 | -0.58512 |
| **337** | 0.445138 | 0.114046 | -0.48083 | -0.48116 | -0.18071 | -0.65224 | -0.45387 | -0.40682 | -0.13301 | -0.31196 | 0.296496 | -0.30496 | -0.89601 | -0.73553 | -0.00163 | -0.28261 |
| **338** | -0.47447 | -0.86011 | -1.30876 | -1.02727 | -1.36654 | -1.1293 | -1.52929 | -0.76392 | -0.93001 | -1.03633 | -0.78201 | -0.81771 | -0.93624 | -0.55977 | -0.72467 | -1.35185 |
| **339** | -0.60783 | -0.30881 | -0.15757 | -0.45253 | -0.74109 | -0.58724 | -0.07043 | -0.06816 | -0.74566 | -0.46978 | -0.7202 | -0.69183 | -0.75309 | -0.29317 | -0.26884 | -0.09485 |
| **340** | -1.59704 | -0.89391 | -1.71931 | -2.17323 | -1.8563 | -1.55331 | -1.74349 | -1.74617 | -1.66651 | -1.10343 | -1.49057 | -1.06639 | -1.97358 | -0.75663 | -1.20115 | -1.07983 |
| **341** | 0.952415 | 1.113277 | 0.989137 | 0.916776 | 0.478989 | 0.797336 | 0.940537 | 0.990786 | 0.828407 | 1.450167 | 0.899944 | 1.304745 | 0.86259 | 1.208598 | 1.188533 | 1.459192 |
| **342** | -1.69159 | -1.36412 | -0.97866 | -1.69383 | -1.27207 | -1.63671 | -1.16956 | -1.73914 | -1.82835 | -0.96361 | -0.9995 | -1.71355 | -0.91803 | -1.05817 | -1.41461 | -1.0193 |
| **343** | 0.929951 | 0.357051 | 0.298305 | 0.573759 | 0.733201 | 0.733476 | 0.475479 | 0.575906 | 1.116479 | 1.059304 | 0.936907 | 0.268653 | 0.870161 | 0.783699 | 0.202996 | 0.585941 |
| **344** | -1.03457 | -0.76334 | -0.82948 | -0.90933 | -0.50996 | -1.03559 | -0.86167 | -1.19835 | -1.28005 | -0.98576 | -0.63814 | -0.59746 | -0.99294 | -0.81668 | -1.24042 | -1.09173 |
| **345** | -0.88234 | -1.41684 | -1.21356 | -1.6068 | -1.27736 | -1.0799 | -1.05967 | -2.19009 | -1.68065 | -1.23438 | -0.86763 | -1.41155 | -1.70422 | -1.36126 | -1.23528 | -1.56831 |
| **346** | -0.9351 | -1.15448 | -1.3084 | -0.73686 | -1.08653 | -0.92256 | -0.12533 | -0.81465 | -1.06617 | -1.11187 | -0.97751 | -0.90974 | -0.60991 | -1.0733 | -1.26702 | -0.79326 |
| **347** | -0.82987 | -0.87518 | -0.48445 | 0.136483 | -0.41191 | -0.20533 | -0.29952 | -0.40597 | -0.36696 | -0.7347 | -0.24292 | -0.86483 | 0.115392 | -0.45546 | -0.49621 | -0.61278 |
| **348** | 0.358826 | 0.594363 | 0.347489 | -0.06753 | -0.3683 | 0.123048 | -0.1117 | 0.127933 | 0.39067 | 0.147887 | 0.126638 | 0.623828 | -0.71323 | 0.370094 | 0.507511 | 0.848628 |
| **349** | 0.219884 | 0.400681 | -0.08633 | 0.682826 | 0.257065 | 0.548362 | 0.210929 | 0.000684 | 0.476846 | 0.595504 | 0.76706 | 0.34508 | 0.118719 | 0.580765 | 0.226616 | 0.069629 |
| **350** | 0.477448 | 0.799996 | 0.837168 | 0.645924 | 0.86481 | 0.805443 | 0.532213 | 0.981757 | 0.035387 | 0.22929 | 0.789076 | 0.753566 | 0.385303 | -0.3462 | 0.630573 | -0.01997 |
| **351** | 0.101141 | -0.17503 | -0.17617 | 0.148925 | -0.26109 | 0.086391 | 0.498923 | 0.159926 | 0.1936 | -0.2099 | 0.190238 | 0.02211 | 0.103899 | 0.045098 | 0.173569 | 0.067391 |
| **352** | -2.44776 | -1.73317 | -1.11373 | -1.67068 | -1.59072 | -1.19479 | -1.10317 | -1.0607 | -1.14421 | -1.61083 | -1.16735 | -1.35622 | -1.40134 | -1.92832 | -0.80526 | -0.79984 |
| **353** | 1.44146 | 1.442513 | 1.708699 | 1.325185 | 1.628966 | 1.105619 | 1.725844 | 1.553995 | 0.926003 | 1.512686 | 1.411523 | 1.576693 | 1.770068 | 1.440863 | 1.323282 | 1.131872 |
| **354** | 1.356835 | 1.451436 | 1.597143 | 1.37156 | 1.118756 | 0.749596 | 1.170814 | 1.394962 | 1.242046 | 1.548724 | 1.54231 | 1.319298 | 1.484295 | 1.526475 | 1.357682 | 1.486111 |
| **355** | -0.12933 | -1.08893 | -1.05075 | -0.37313 | -0.57279 | -0.72066 | -0.71188 | -0.46556 | -0.60286 | -0.63161 | -0.72186 | -0.77264 | 0.555383 | -0.97227 | -0.99784 | -0.96886 |
| **356** | -0.55482 | -1.23967 | -0.48811 | 0.192938 | -0.07262 | -0.15412 | 0.078865 | -0.09074 | -0.53936 | -0.23788 | -0.60639 | -0.25941 | -0.27593 | -0.25329 | -0.78194 | -0.37838 |
| **357** | -1.10877 | -1.18233 | -1.31381 | -1.25571 | -0.90033 | -0.89336 | -1.43322 | -1.52829 | -1.69981 | -0.98204 | -1.41238 | -0.64808 | -1.79724 | -1.24364 | -1.08938 | -1.18342 |
| **358** | -0.51173 | 0.173834 | 0.467329 | -1.04318 | -0.5286 | -0.4394 | -0.37522 | -0.80017 | -1.40426 | 0.017761 | -0.06155 | -0.16253 | -1.0629 | 0.253672 | 0.004646 | -0.12092 |
| **359** | -0.81016 | -0.49967 | -0.7983 | -0.63391 | -0.76366 | -0.91986 | -0.50746 | -0.81882 | -0.53869 | -0.51682 | -0.803 | -0.79339 | -0.47396 | -0.0035 | -0.33602 | -0.87417 |
| **360** | 0.744126 | 0.057567 | 0.934479 | 0.674142 | 0.864507 | 0.612432 | 0.417392 | 0.360743 | 0.224334 | 0.244032 | 0.327907 | 0.627964 | 0.00428 | 0.419801 | 0.474997 | 0.645472 |
| **361** | 1.119693 | 0.614791 | 0.65739 | 1.015507 | 0.794138 | 0.555915 | 0.449301 | 0.903482 | 0.962181 | 0.448288 | 0.492507 | 0.901044 | 0.790944 | 0.23589 | 0.952653 | 0.813274 |
| **362** | 1.952822 | 2.245693 | 1.972224 | 1.825767 | 2.594436 | 2.115933 | 2.196091 | 2.154381 | 1.667918 | 2.409901 | 2.591933 | 1.97729 | 2.329711 | 2.251608 | 1.522051 | 1.6457 |
| **363** | 0.379435 | 0.834459 | 0.578751 | 0.53275 | 0.770151 | 1.340028 | 0.716089 | 0.943712 | 0.867332 | 0.982232 | 1.170681 | 0.879764 | 0.353665 | 0.424376 | 0.963285 | 0.752446 |
| **364** | 0.712425 | -0.23247 | -0.51758 | -0.00595 | 0.066737 | 0.095338 | 0.44026 | 0.488048 | 0.60366 | -0.22723 | -0.31638 | -0.17447 | -0.0241 | -0.55486 | -0.1346 | -0.42701 |
| **365** | -0.09977 | -0.14693 | -0.49967 | -0.34131 | -0.34243 | -0.47776 | -0.50662 | -0.0515 | -0.15976 | -0.61862 | -0.9439 | -0.06382 | -0.56041 | -0.3552 | 0.251448 | -0.06826 |
| **366** | -0.16722 | -0.70482 | -0.50071 | -0.36106 | -0.53518 | -0.87529 | -0.64241 | -0.20233 | -0.45913 | -0.58483 | -0.14271 | -0.45916 | 0.106516 | -0.63879 | -0.55873 | 0.021644 |
| **367** | -1.48232 | -0.8597 | -0.11876 | -0.97943 | 0.02574 | -0.74986 | -0.63093 | -0.99246 | -0.67444 | -1.2739 | -1.47123 | -0.86664 | -0.80334 | -1.66433 | -1.24404 | -0.77971 |
| **368** | 0.730757 | 1.293551 | 1.094276 | 0.729136 | 0.823681 | 1.305359 | 0.490391 | 0.721278 | 0.698806 | 0.837333 | 0.249797 | 1.538771 | 0.014205 | 1.360902 | 1.500178 | 0.99062 |
| **369** | -0.85547 | -0.86637 | -0.58579 | -0.87747 | -1.07216 | -0.77525 | -1.00753 | -0.58772 | -1.01931 | -0.60732 | -0.79117 | -1.10939 | -1.39339 | -0.31326 | -0.60237 | -0.72161 |
| **370** | -0.09038 | 0.529827 | 1.007265 | 0.663042 | 0.849662 | 0.454702 | 0.504554 | 0.512957 | 0.567896 | 0.926676 | 0.581141 | 0.832556 | 0.487885 | 0.496342 | 0.845434 | 0.786731 |
| **371** | -1.39277 | -2.32658 | -2.08392 | -1.84143 | -1.95582 | -1.87164 | -1.83876 | -1.7549 | -1.80359 | -1.69892 | -2.40266 | -2.16844 | -2.89731 | -1.34674 | -1.43372 | -1.54706 |
| **372** | 1.295417 | 1.155023 | 0.863289 | 0.460832 | 0.633756 | 0.973684 | 0.645257 | 0.95302 | 0.867146 | 1.332096 | 1.656647 | 0.897561 | 0.742224 | 1.128735 | 2.014629 | 1.007586 |
| **373** | -0.13566 | -0.02885 | 0.064102 | 0.018029 | 0.280592 | -0.21744 | -0.36679 | -0.37908 | -0.51523 | -0.09962 | -0.21789 | -0.12548 | -0.33491 | -0.04236 | 0.26775 | -0.30637 |
| **374** | -0.85264 | -0.37917 | -0.27847 | -0.3064 | -0.433 | -0.66891 | 0.043702 | -0.3964 | -0.64662 | -0.6847 | -0.92184 | -0.30897 | 0.272086 | -0.45106 | -0.77613 | -0.38553 |
| **375** | -0.56055 | -0.86005 | -1.07641 | -0.06167 | -0.53266 | -0.7327 | -0.71742 | -0.72935 | -0.42695 | -0.84432 | -0.4764 | -0.6258 | -0.35809 | -0.7525 | -0.91968 | -0.66625 |
| **376** | 0.030102 | -0.05894 | -0.80905 | -0.25396 | -0.22986 | -0.63542 | -0.65829 | 0.003599 | -0.34786 | 0.045579 | -0.35598 | -0.1224 | -0.25993 | -0.02467 | -0.14607 | -0.51644 |
| **377** | -0.84056 | -0.73377 | -1.17525 | -1.31437 | -0.98342 | -0.47665 | -0.99183 | -0.8136 | -0.43172 | -0.32838 | -0.93373 | -0.84341 | -0.94514 | -0.46606 | -0.62544 | -0.54712 |
| **378** | -0.42566 | -0.36791 | 1.11049 | 0.467444 | 0.56357 | 0.267664 | -0.24247 | -0.31862 | -0.31016 | -0.15782 | 0.067843 | -0.0462 | 0.112343 | -0.31291 | -0.51198 | 0.216831 |
| **379** | -0.98399 | -0.34001 | -0.71957 | -1.03569 | -0.98026 | -0.57851 | -0.83937 | -0.7408 | -0.36524 | -0.79121 | -0.7246 | -1.21786 | -0.92286 | -1.35134 | -1.14903 | -0.70982 |
| **380** | 1.980969 | 1.843397 | 1.930453 | 2.290529 | 1.773472 | 2.039994 | 2.18379 | 2.178043 | 2.48099 | 1.939238 | 2.044703 | 1.791153 | 2.40173 | 1.8388 | 2.302542 | 2.489967 |
| **381** | 0.542612 | 0.862637 | 0.647815 | 0.944605 | 1.06297 | 0.534574 | 0.748037 | 0.489714 | 0.78821 | 0.49213 | 0.940314 | 0.358411 | 0.710785 | 0.571666 | 0.655665 | 1.061207 |
| **382** | 0.128335 | -0.09919 | 0.053384 | 0.430169 | 0.119469 | 0.340147 | 0.414846 | 0.548681 | -0.15761 | -0.09266 | -0.22404 | 0.188447 | 0.055133 | -0.00337 | 0.082738 | -0.37278 |
| **383** | -0.07365 | -0.3744 | -0.15715 | -0.48221 | -0.4102 | -0.64576 | -0.3221 | -0.63683 | -0.06892 | -0.54299 | -0.15107 | -0.24367 | -0.43652 | -0.04106 | 0.242734 | 0.159939 |
| **384** | -0.67547 | -0.49135 | 0.167231 | -0.23652 | -0.37537 | -0.42129 | -0.61936 | -0.46122 | -0.74832 | -0.64386 | -0.91307 | -0.47148 | -0.93164 | -0.30838 | -0.5071 | -0.22167 |

**Reference**

[1] T. Wolf, L. Debut, V. Sanh, J. Chaumond, C. Delangue, A. Moi, P. Cistac, T. Rault, R. Louf, M. Funtowicz, J. Davison, S. Shleifer, P. von Platen, C. Ma, Y. Jernite, J. Plu, C. Xu, T. Le Scao, S. Gugger, M. Drame, Q. Lhoest, A. Rush, Transformers: State-of-the-Art Natural Language Processing, Association for Computational Linguistics, Online, 2020, pp. 38-45.

[2] S. Tian, X. Jiang, W. Wang, Z. Jing, C. Zhang, C. Zhang, T. Lookman, Y. Su, Steel design based on a large language model, Acta Materialia 285 (2025).

[3] F. Nogueira, Bayesian Optimization: Open source constrained global optimization tool for Python, (2014).

[4] F. Pedregosa, G. Varoquaux, A. Gramfort, V. Michel, B. Thirion, O. Grisel, M. Blondel, P. Prettenhofer, R. Weiss, V. Dubourg, J. Vanderplas, A. Passos, D. Cournapeau, M. Brucher, M. Perrot, É. Duchesnay, Scikit-learn: Machine Learning in Python, J. Mach. Learn. Res. 12(null) (2011) 2825–2830.
